# Supplementary material
Source: PubMed Central journal article supplement (PMC6726543)
Supplement: NIHMS1048464-supplement-SI.pdf [file NIHMS1048464-supplement-SI.pdf]

# Supporting Information

## Ground State Destabilization in Uracil DNA Glycosylase (UDG): Let's Not Forget "Tautomeric Strain" in Substrates

Ranjita Das,<sup>†</sup> Erik A. Vázquez-Montelongo,<sup>‡</sup> G. Andrés Cisneros<sup>‡</sup> and Judy I. Wu<sup>†,\*</sup>

<sup>†</sup> Department of Chemistry, University of Houston, Houston, Texas 77204, United States

<sup>‡</sup> Department of Chemistry, University of North Texas, Denton, Texas 76201, United States

### Table of Contents

|                                                                                                                                                                                                                                                                                                                                            |    |
|--------------------------------------------------------------------------------------------------------------------------------------------------------------------------------------------------------------------------------------------------------------------------------------------------------------------------------------------|----|
| Full citation for Gaussian09: .....                                                                                                                                                                                                                                                                                                        | 2  |
| Supplementary Note 1: Harmonic Oscillator Model of Electron Delocalization (HOMED).....                                                                                                                                                                                                                                                    | 3  |
| Figure S1: Computed gas-phase S <sub>N</sub> 2 activation free energy barrier for N-CH <sub>3</sub> bond cleavage in naked (in black), three water bound (in blue), and two zwitterionic glycine bound 1-methyl-uracil with formate as the nucleophile. Free energies (ΔG, in kcal/mol) were computed at 298 K at ωB97X-D/6-31+G(d). ..... | 4  |
| Figure S2. QM/MM model of the UDG active site used for geometry optimization: Green and pink dots represents boundary atoms and pseudo-bonds, respectively. ....                                                                                                                                                                           | 5  |
| Figure S3. QM/MM model of the UDG active site used for single-point calculation: Green and pink dots represents boundary atoms and pseudo-bonds, respectively. ....                                                                                                                                                                        | 6  |
| Table S1. Computed relative energies (ΔE, in the gas-phase, and at ε = 4) for substrate (1-4)-residue complexes.....                                                                                                                                                                                                                       | 7  |
| Optimized Cartesian coordinates at ωB97X-D/6-31+G(d).....                                                                                                                                                                                                                                                                                  | 8  |
| Optimized Cartesian coordinates for stationary points on the stepwise reaction pathway of glycosidic N1-C1' bond cleavage, using a constrained and truncated QM model. All geometries were optimized in the gas-phase at ωB97X-D/6-31+G(d).....                                                                                            | 36 |
| Optimized Cartesian coordinates for QM/MM active site for geometry optimization calculations. ....                                                                                                                                                                                                                                         | 50 |
| Cartesian coordinates for QM/MM active site for single-point calculations. ....                                                                                                                                                                                                                                                            | 53 |

Full citation for Gaussian09:

Gaussian 09, Revision E.01, M. J. Frisch, G. W. Trucks, H. B. Schlegel, G. E. Scuseria, M. A. Robb, J. R. Cheeseman, G. Scalmani, V. Barone, B. Mennucci, G. A. Petersson, H. Nakatsuji, M. Caricato, X. Li, H. P. Hratchian, A. F. Izmaylov, J. Bloino, G. Zheng, J. L. Sonnenberg, M. Hada, M. Ehara, K. Toyota, R. Fukuda, J. Hasegawa, M. Ishida, T. Nakajima, Y. Honda, O. Kitao, H. Nakai, T. Vreven, J. A. Montgomery, Jr., J. E. Peralta, F. Ogliaro, M. Bearpark, J. J. Heyd, E. Brothers, K. N. Kudin, V. N. Staroverov, T. Keith, R. Kobayashi, J. Normand, K. Raghavachari, A. Rendell, J. C. Burant, S. S. Iyengar, J. Tomasi, M. Cossi, N. Rega, J. M. Millam, M. Klene, J. E. Knox, J. B. Cross, V. Bakken, C. Adamo, J. Jaramillo, R. Gomperts, R. E. Stratmann, O. Yazyev, A. J. Austin, R. Cammi, C. Pomelli, J. W. Ochterski, R. L. Martin, K. Morokuma, V. G. Zakrzewski, G. A. Voth, P. Salvador, J. J. Dannenberg, S. Dapprich, A. D. Daniels, O. Farkas, J. B. Foresman, J. V. Ortiz, J. Cioslowski, and D. J. Fox, Gaussian, Inc., Wallingford CT, 2013.

## Supplementary Note 1: Harmonic Oscillator Model of Electron Delocalization (HOMED)

HOMED is a geometric criterion for quantifying the aromaticity of heterocycles:

$$\text{HOMED} = 1 - \frac{1}{n} \left\{ \alpha_{CC} \sum [R_o(\text{CC}) - R_i(\text{CC})]^2 + \alpha_{CX} \sum [R_o(\text{CX}) - R_i(\text{CX})]^2 \right\}$$

where  $\alpha_{CC}$  and  $\alpha_{CX}$  are based on:

$$\alpha_{2i} = 2 \{ (R_o - R_s)^2 + (R_o - R_d)^2 \}^{-1} \text{ for heterocycles with an even number of bonds.}$$

$$\alpha_{2i+1} = (2i+1) \{ (i+1)(R_o - R_s)^2 + i(R_o - R_d)^2 \}^{-1} \text{ for heterocycles with an odd number of bonds.}$$

Based on the computed geometries of selected reference compounds (see right):  $R_s$  (single bond length),  $R_d$  (double bond length), and  $R_o$  (optimal bond length) are the reference bond lengths for CC and CN bonds. All reference bond lengths and HOMED parameters were computed at  $\omega\text{B97X-D/6-31+G(d)}$ .

| Bond | $R_s$                            | $R_d$                            | $R_o$                                                                               |
|------|----------------------------------|----------------------------------|-------------------------------------------------------------------------------------|
| C-C  | $\text{H}_3\text{C}-\text{CH}_3$ | $\text{H}_2\text{C}=\text{CH}_2$ |  |
| C-N  | $\text{H}_3\text{C}-\text{NH}_2$ | $\text{H}_2\text{C}=\text{NH}$   |  |

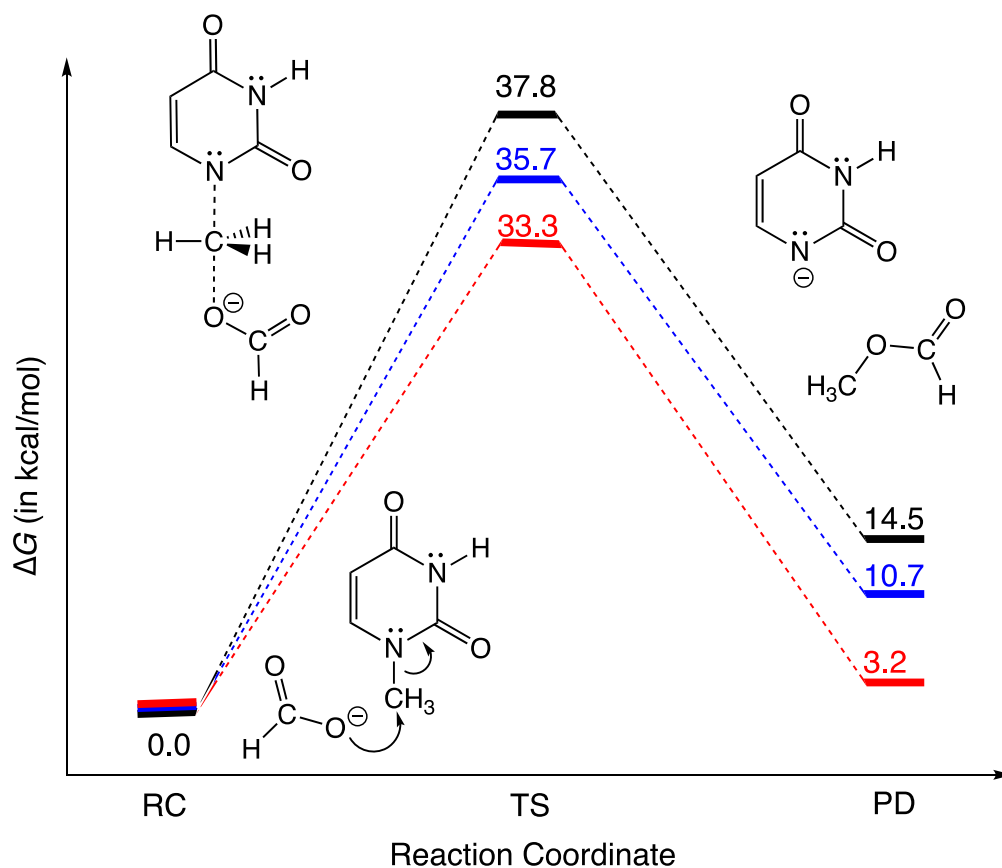

Figure S1: Computed gas-phase  $S_N2$  activation free energy barrier for N- $\text{CH}_3$  bond cleavage in naked (in black), three water bound (in blue), and two zwitterionic glycine bound 1-methyl-uracil with formate as the nucleophile. Free energies ( $\Delta G$ , in kcal/mol) were computed at 298 K at  $\omega\text{B97X-D/6-31+G(d)}$ .

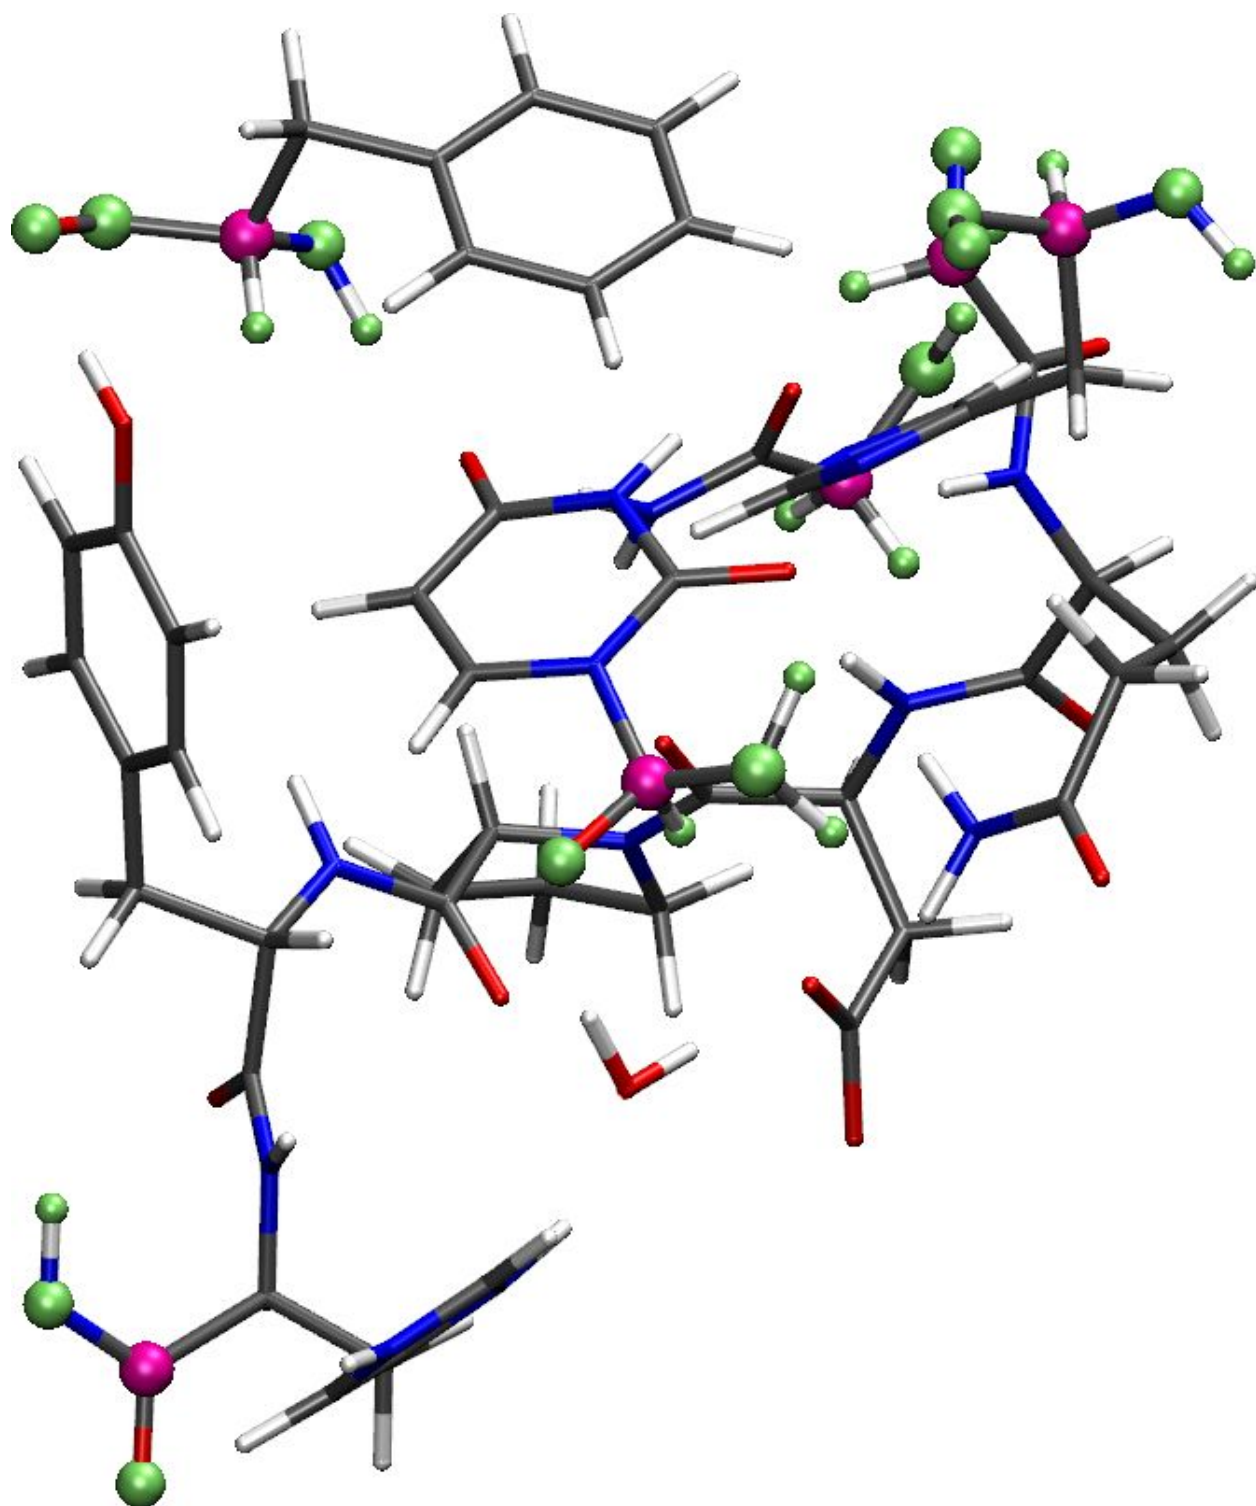

Figure S2. QM/MM model of the UDG active site used for geometry optimization: Green and pink dots represents boundary atoms and pseudo-bonds, respectively.

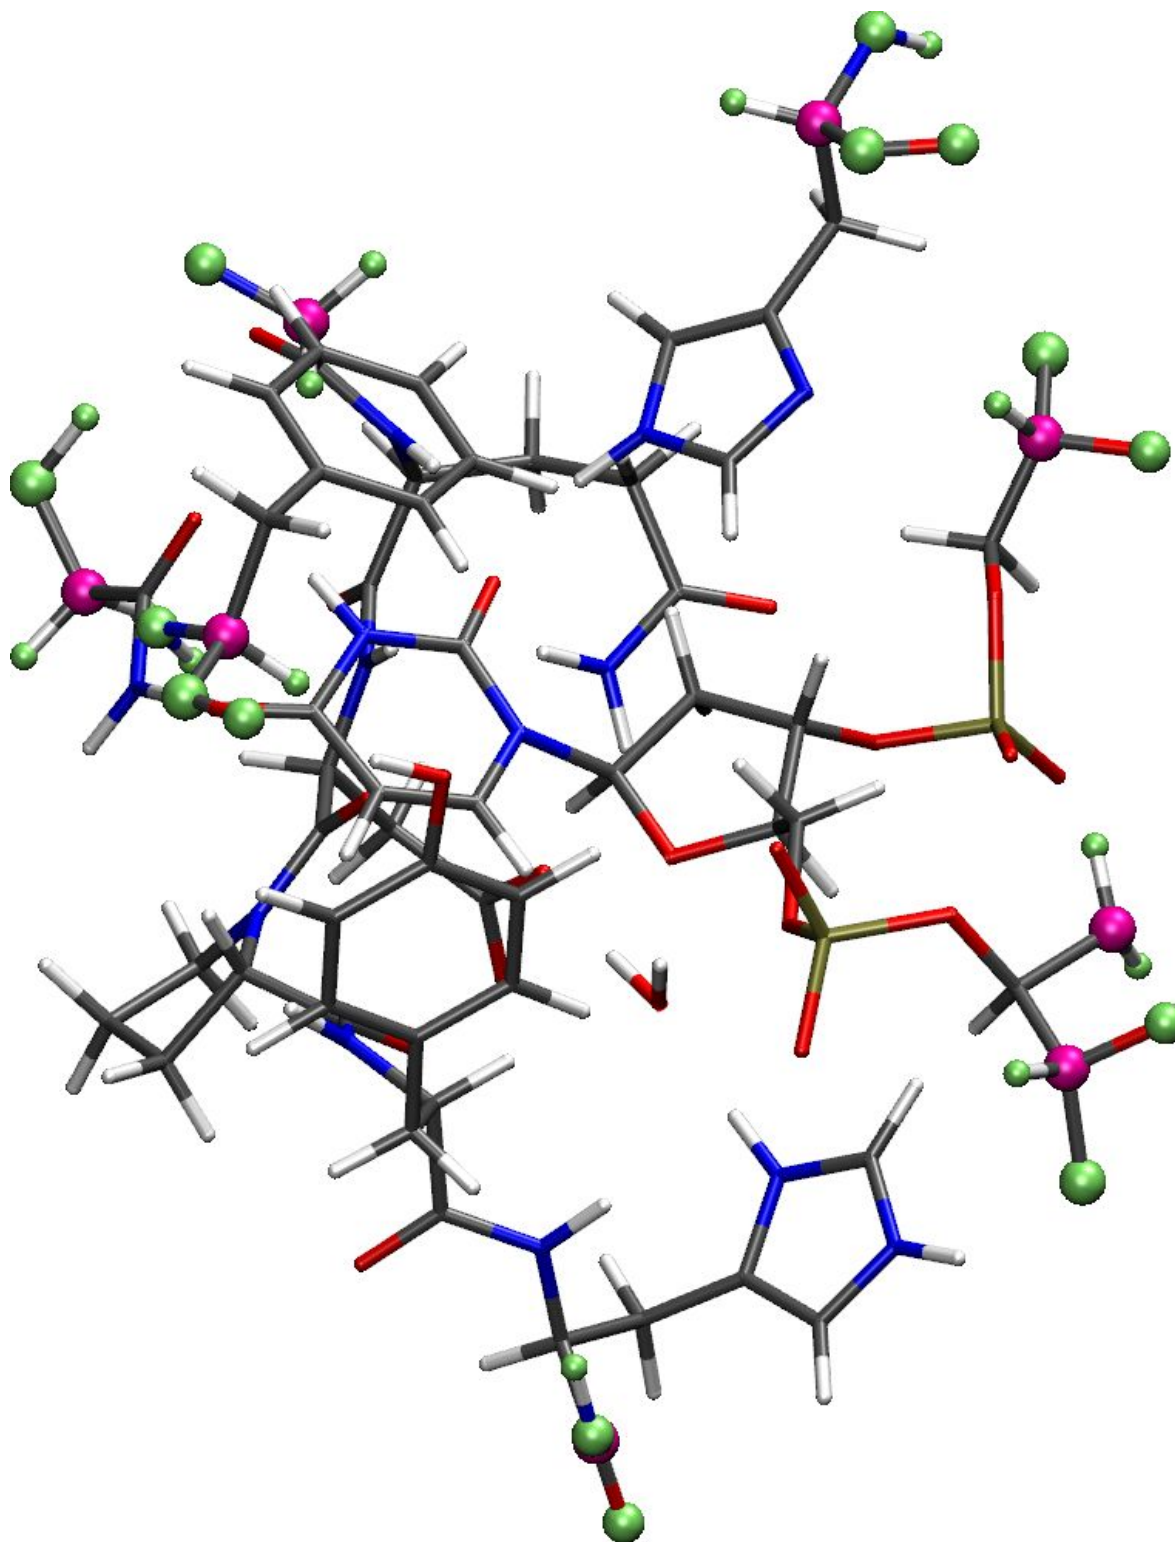

Figure S3. QM/MM model of the UDG active site used for single-point calculation: Green and pink dots represents boundary atoms and pseudo-bonds, respectively.

Table S1. Computed relative energies ( $\Delta E$ , in the gas-phase, and at  $\epsilon = 4$ ) for substrate (1-4)-residue complexes.

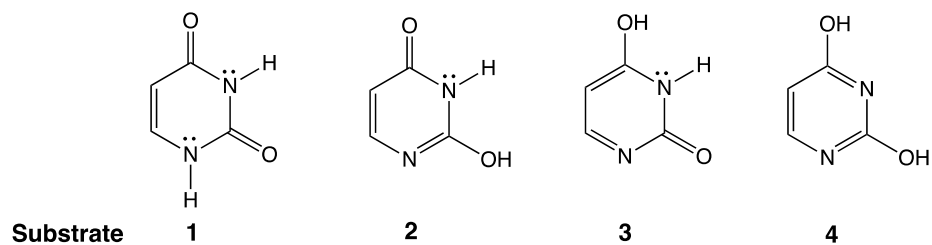

| Complex   | $\Delta E$ (kcal/mol) |                  |
|-----------|-----------------------|------------------|
|           | Gas phase             | $\epsilon = 4.0$ |
| 1-residue | 0.00                  | 0.00             |
| 2-residue | 15.57                 | 18.42            |
| 3-residue | 24.12                 | 22.18            |
| 4-residue | 17.53                 | 19.75            |

Optimized Cartesian coordinates at  $\omega$ B97X-D/6-31+G(d).

**Uracil**

|   |          |          |         |
|---|----------|----------|---------|
| N | -1.19417 | 0.94912  | 0.00000 |
| C | -0.05599 | 1.71901  | 0.00000 |
| H | -0.22201 | 2.79047  | 0.00000 |
| C | 1.17287  | 1.17070  | 0.00000 |
| H | 2.07135  | 1.77228  | 0.00000 |
| C | 1.31599  | -0.28180 | 0.00000 |
| O | 2.36601  | -0.89601 | 0.00000 |
| N | 0.09204  | -0.97104 | 0.00000 |
| C | -1.18124 | -0.43788 | 0.00000 |
| O | -2.19667 | -1.10466 | 0.00000 |
| H | 0.14442  | -1.98317 | 0.00000 |
| H | -2.11196 | 1.37027  | 0.00000 |

Charge: 0 Point Group:  $C_s$

Total electronic energy = -414.70095 a.u.

Zero-point corrected total electronic energy ( $E_{ZPE}$ ) = -414.61247 a.u.

No. of imaginary frequency = 0

**Uracil (in implicit solvation at  $\epsilon = 4.0$ , with IEF-PCM model)**

|   |          |          |         |
|---|----------|----------|---------|
| N | -1.13713 | -1.02353 | 0.00000 |
| C | 0.05335  | -1.70429 | 0.00000 |
| H | -0.03184 | -2.78450 | 0.00000 |
| C | 1.23904  | -1.06308 | 0.00000 |
| H | 2.17782  | -1.59951 | 0.00000 |
| C | 1.26761  | 0.38945  | 0.00000 |
| O | 2.27138  | 1.08859  | 0.00000 |
| N | 0.00000  | 0.98540  | 0.00000 |
| C | -1.22579 | 0.35408  | 0.00000 |
| O | -2.28999 | 0.95108  | 0.00000 |
| H | -0.02616 | 1.99910  | 0.00000 |
| H | -2.01631 | -1.52258 | 0.00000 |

Charge: 0 Point Group:  $C_s$

Total electronic energy = -414.71309 a.u.

Zero-point corrected total electronic energy ( $E_{ZPE}$ ) = -414.62466 a.u.

No. of imaginary frequency = 0

**Uracil (in implicit water solvation, with IEF-PCM model)**



|   |          |          |         |
|---|----------|----------|---------|
| C | -0.40973 | 1.20636  | 0.00000 |
| N | -0.98372 | -0.04709 | 0.00000 |
| C | -0.32718 | -1.28110 | 0.00000 |
| C | 1.11918  | -1.18530 | 0.00000 |
| C | 1.70386  | 0.03057  | 0.00000 |
| N | 0.96694  | 1.18580  | 0.00000 |
| O | -1.06275 | 2.24035  | 0.00000 |
| O | -0.98063 | -2.31986 | 0.00000 |
| H | 2.77817  | 0.16818  | 0.00000 |
| H | 1.70322  | -2.09533 | 0.00000 |
| H | -1.99771 | -0.06845 | 0.00000 |
| H | 1.42775  | 2.08649  | 0.00000 |

Charge: 0 Point Group:  $C_s$

Total electronic energy = -414.71928 a.u.

Zero-point corrected total electronic energy ( $E_{ZPE}$ ) = -414.63091 a.u.

No. of imaginary frequency = 0

### Uracil : 3H<sub>2</sub>O

|   |          |          |          |
|---|----------|----------|----------|
| C | 1.15187  | 0.73967  | -0.04793 |
| N | -0.00115 | 0.00216  | -0.03728 |
| C | -0.08759 | -1.38619 | -0.04130 |
| C | 1.18686  | -2.08745 | 0.01888  |
| C | 2.32979  | -1.37679 | 0.03629  |
| N | 2.31647  | -0.00525 | 0.00143  |
| O | 1.18820  | 1.96383  | -0.09734 |
| O | -1.17765 | -1.94775 | -0.09368 |
| H | -0.90041 | 0.54579  | -0.01557 |
| H | 1.17869  | -3.16847 | 0.03693  |
| H | 3.31215  | -1.83372 | 0.07211  |
| H | 3.17326  | 0.52962  | -0.00963 |
| O | -0.93392 | 3.51766  | -1.14572 |
| O | -2.33687 | 1.43392  | 0.00050  |
| O | -3.55884 | -0.79108 | -1.05974 |
| H | -0.13274 | 3.08856  | -0.78643 |
| H | -0.99477 | 4.37342  | -0.70718 |
| H | -2.96211 | 0.86602  | -0.49332 |
| H | -2.13320 | 2.22695  | -0.53351 |
| H | -2.78869 | -1.29595 | -0.72876 |
| H | -4.32650 | -1.14770 | -0.59960 |

Charge: 0 Point Group:  $C_1$

Total electronic energy = -643.95359 a.u.

Zero-point corrected total electronic energy ( $E_{ZPE}$ ) = -643.78786 a.u.

No. of imaginary frequency = 0

**2 (keto-enol tautomer of uracil)**

|   |          |          |         |
|---|----------|----------|---------|
| N | 1.19364  | -1.05638 | 0.00000 |
| C | -0.01732 | -1.70386 | 0.00000 |
| H | 0.05124  | -2.78783 | 0.00000 |
| C | -1.22777 | -1.08685 | 0.00000 |
| H | -2.15835 | -1.63997 | 0.00000 |
| C | -1.30077 | 0.35909  | 0.00000 |
| O | -2.29448 | 1.06410  | 0.00000 |
| N | -0.01806 | 0.95459  | 0.00000 |
| C | 1.12805  | 0.23824  | 0.00000 |
| O | 2.23378  | 0.98538  | 0.00000 |
| H | 0.01990  | 1.96778  | 0.00000 |
| H | 2.98796  | 0.37521  | 0.00000 |

Charge: 0 Point Group:  $C_s$

Total electronic energy = -414.68015 a.u.

Zero-point corrected total electronic energy ( $E_{ZPE}$ ) = -414.59201 a.u.

No. of imaginary frequency = 0

**2 (keto-enol tautomer of uracil in implicit solvation at  $\epsilon = 4.0$ , with IEF-PCM model)**

|   |          |          |         |
|---|----------|----------|---------|
| N | 1.16583  | -1.09364 | 0.00000 |
| C | -0.05787 | -1.71125 | 0.00000 |
| H | -0.01870 | -2.79647 | 0.00000 |
| C | -1.25463 | -1.06393 | 0.00000 |
| H | -2.19638 | -1.59783 | 0.00000 |
| C | -1.28719 | 0.37834  | 0.00000 |
| O | -2.27256 | 1.10776  | 0.00000 |
| N | 0.00000  | 0.94507  | 0.00000 |
| C | 1.13187  | 0.20514  | 0.00000 |
| O | 2.24681  | 0.93062  | 0.00000 |
| H | 0.06587  | 1.95773  | 0.00000 |
| H | 3.00132  | 0.31969  | 0.00000 |

Charge: 0 Point Group:  $C_s$

Total electronic energy = -414.68943 a.u.

Zero-point corrected total electronic energy ( $E_{ZPE}$ ) = -414.60144 a.u.

No. of imaginary frequency = 0

**3 (keto-enol tautomer of uracil)**

|   |          |          |         |
|---|----------|----------|---------|
| N | -1.27575 | -1.10077 | 0.00000 |
| C | -0.11626 | -1.70564 | 0.00000 |
| H | -0.15472 | -2.79461 | 0.00000 |
| C | 1.15717  | -1.08454 | 0.00000 |
| H | 2.07637  | -1.65682 | 0.00000 |
| C | 1.14302  | 0.28642  | 0.00000 |
| O | 2.20213  | 1.10447  | 0.00000 |
| N | -0.03861 | 0.93091  | 0.00000 |
| C | -1.30368 | 0.27853  | 0.00000 |
| O | -2.30358 | 0.96611  | 0.00000 |
| H | -0.05751 | 1.94421  | 0.00000 |
| H | 3.02092  | 0.59140  | 0.00000 |

Charge: 0 Point Group:  $C_s$

Total electronic energy = -414.66307 a.u.

Zero-point corrected total electronic energy ( $E_{ZPE}$ ) = -414.57575 a.u.

No. of imaginary frequency = 0

**3 (keto-enol tautomer of uracil in implicit solvation at  $\epsilon = 4.0$ , with IEF-PCM model)**

|   |          |          |         |
|---|----------|----------|---------|
| N | -1.27566 | -1.09325 | 0.00000 |
| C | -0.11096 | -1.70631 | 0.00000 |
| H | -0.15228 | -2.79419 | 0.00000 |
| C | 1.15400  | -1.08866 | 0.00000 |
| H | 2.07373  | -1.65906 | 0.00000 |
| C | 1.14200  | 0.28616  | 0.00000 |
| O | 2.19410  | 1.10064  | 0.00000 |
| N | -0.04208 | 0.93029  | 0.00000 |
| C | -1.29328 | 0.27926  | 0.00000 |
| O | -2.30701 | 0.96464  | 0.00000 |
| H | -0.05319 | 1.94468  | 0.00000 |
| H | 3.02013  | 0.59548  | 0.00000 |

Charge: 0 Point Group:  $C_s$

Total electronic energy = -414.67851 a.u.

Zero-point corrected total electronic energy ( $E_{ZPE}$ ) = -414.59101a.u.

No. of imaginary frequency = 0

#### 4 (dienol tautomer of uracil)

|   |          |          |         |
|---|----------|----------|---------|
| N | -1.24331 | -1.05382 | 0.00000 |
| C | -0.08441 | -1.72838 | 0.00000 |
| H | -0.16735 | -2.81214 | 0.00000 |
| C | 1.15172  | -1.11290 | 0.00000 |
| H | 2.08524  | -1.66014 | 0.00000 |
| C | 1.11842  | 0.28705  | 0.00000 |
| O | 2.26749  | 0.97080  | 0.00000 |
| N | -0.00714 | 0.98684  | 0.00000 |
| C | -1.13012 | 0.27128  | 0.00000 |
| O | -2.26013 | 0.98441  | 0.00000 |
| H | 2.04122  | 1.91475  | 0.00000 |
| H | -2.99369 | 0.35078  | 0.00000 |

Charge: 0 Point Group:  $C_s$

Total electronic energy = -414.67518 a.u.

Zero-point corrected total electronic energy ( $E_{ZPE}$ ) = -414.58702 a.u.

No. of imaginary frequency = 0

#### 4 (dienol tautomer of uracil in implicit solvation at $\epsilon = 4.0$ , with IEF-PCM model)

|   |          |          |         |
|---|----------|----------|---------|
| N | -1.24438 | -1.05862 | 0.00000 |
| C | -0.08174 | -1.73090 | 0.00000 |
| H | -0.15923 | -2.81454 | 0.00000 |
| C | 1.15179  | -1.11126 | 0.00000 |
| H | 2.08544  | -1.65833 | 0.00000 |
| C | 1.11700  | 0.28839  | 0.00000 |
| O | 2.26694  | 0.96940  | 0.00000 |
| N | -0.01264 | 0.98477  | 0.00000 |
| C | -1.13343 | 0.26574  | 0.00000 |
| O | -2.26203 | 0.98419  | 0.00000 |
| H | 2.05642  | 1.91751  | 0.00000 |
| H | -3.00620 | 0.36217  | 0.00000 |

Charge: 0 Point Group:  $C_s$

Total electronic energy = -414.68207 a.u.

Zero-point corrected total electronic energy ( $E_{ZPE}$ ) = -414.59423 a.u.

No. of imaginary frequency = 0

#### 1uracil (hydrogen-bonded to His, Asn, and a fragment of protein backbone)

|   |          |         |         |
|---|----------|---------|---------|
| C | -2.36335 | 1.06679 | 0.65946 |
|---|----------|---------|---------|

|   |          |          |          |
|---|----------|----------|----------|
| N | -2.47624 | 0.31487  | -0.47599 |
| C | -3.61585 | 0.18946  | -1.27207 |
| C | -4.74793 | 1.00195  | -0.85500 |
| C | -4.64213 | 1.76582  | 0.24835  |
| N | -3.48576 | 1.79388  | 0.99001  |
| O | -1.34862 | 1.10342  | 1.35221  |
| O | -3.61502 | -0.56410 | -2.23780 |
| H | -1.63335 | -0.22289 | -0.77068 |
| N | 2.16390  | -1.05714 | 0.43280  |
| C | 1.86314  | -1.55440 | 1.76692  |
| C | 0.59739  | -2.41082 | 1.64421  |
| O | 0.65764  | -3.60640 | 1.36732  |
| C | 1.79655  | -0.43266 | 2.80682  |
| N | -0.58511 | -1.77376 | 1.80862  |
| C | -1.82923 | -2.44924 | 1.51155  |
| C | 0.78650  | -3.19103 | -1.89647 |
| C | -0.34503 | -2.20257 | -1.89984 |
| O | -0.24605 | -1.11612 | -1.29582 |
| N | -1.47322 | -2.53406 | -2.54311 |
| C | 4.27805  | 3.65595  | -0.69346 |
| C | 2.93181  | 3.00815  | -0.66809 |
| N | 2.15685  | 2.89600  | -1.80251 |
| C | 2.27772  | 2.44699  | 0.39895  |
| C | 1.06020  | 2.27993  | -1.41937 |
| N | 1.08116  | 1.98587  | -0.09541 |
| H | 1.06106  | 0.33566  | 2.54265  |
| H | 2.77868  | 0.04443  | 2.86617  |
| H | 2.66568  | -2.24295 | 2.04401  |
| H | -0.60248 | -0.76262 | 1.86065  |
| H | 0.89322  | -3.59348 | -0.88252 |
| H | 0.63271  | -4.01437 | -2.59865 |
| H | -2.26235 | -1.88418 | -2.55433 |
| H | -1.55642 | -3.41279 | -3.02931 |
| H | 4.20327  | 4.70118  | -1.01310 |
| H | 4.74298  | 3.62854  | 0.29662  |
| H | 2.56037  | 2.31932  | 1.43308  |
| H | 0.34181  | 1.53850  | 0.43515  |
| H | 0.22924  | 2.01267  | -2.05837 |
| H | -5.44720 | 2.39136  | 0.61611  |
| H | 4.94354  | 3.14467  | -1.39807 |

|   |          |          |          |
|---|----------|----------|----------|
| H | 1.71538  | -2.67141 | -2.14450 |
| H | 1.39325  | -0.89493 | -0.21036 |
| C | 3.43929  | -0.81264 | 0.02929  |
| H | 1.54152  | -0.83096 | 3.79467  |
| O | 4.40227  | -0.95523 | 0.77558  |
| C | 3.59718  | -0.38905 | -1.41758 |
| H | 2.65184  | -0.11018 | -1.89203 |
| H | 4.27685  | 0.46394  | -1.46418 |
| H | 4.05434  | -1.21488 | -1.97346 |
| H | -5.65425 | 0.96462  | -1.44345 |
| H | -1.89480 | -3.38217 | 2.07653  |
| H | -2.65901 | -1.79937 | 1.80047  |
| H | -1.91608 | -2.69103 | 0.44478  |
| H | -3.40700 | 2.36451  | 1.82047  |

Charge: 0      Point Group:  $C_1$

Total electronic energy = -1385.10132 a.u.

Zero-point corrected total electronic energy ( $E_{ZPE}$ ) = -1384.64141a.u.

No. of imaginary frequency = 1 (18.5i cm<sup>-1</sup>, corresponding to His methyl rotation)

**1uracil (hydrogen-bonded to His, Asn, and a fragment of protein backbone in implicit solvation at  $\epsilon = 4.0$ , with IEF-PCM model)**

|   |          |          |          |
|---|----------|----------|----------|
| C | 2.26678  | 1.28540  | -1.10062 |
| N | 2.52367  | 0.77688  | 0.14105  |
| C | 3.71568  | 0.90764  | 0.85257  |
| C | 4.73670  | 1.69874  | 0.19549  |
| C | 4.48764  | 2.21792  | -1.02333 |
| N | 3.28670  | 2.01314  | -1.65589 |
| O | 1.19806  | 1.10189  | -1.69092 |
| O | 3.83663  | 0.36620  | 1.94976  |
| H | 1.75941  | 0.23357  | 0.58979  |
| N | -1.94188 | -1.24283 | -0.22925 |
| C | -1.65183 | -1.90906 | -1.49311 |
| C | -0.29131 | -2.60304 | -1.34334 |
| O | -0.21358 | -3.77298 | -0.96185 |
| C | -1.75869 | -0.96271 | -2.69067 |
| N | 0.79795  | -1.85926 | -1.61739 |
| C | 2.13484  | -2.34455 | -1.34109 |
| C | -0.20870 | -2.79880 | 2.30692  |

|   |          |          |          |
|---|----------|----------|----------|
| C | 0.77226  | -1.68112 | 2.08514  |
| O | 0.48833  | -0.72466 | 1.33216  |
| N | 1.95956  | -1.75355 | 2.69428  |
| C | -4.52415 | 3.35092  | 0.28779  |
| C | -3.11094 | 2.86556  | 0.28638  |
| N | -2.28189 | 3.02781  | 1.37756  |
| C | -2.43492 | 2.21546  | -0.71454 |
| C | -1.13257 | 2.48281  | 1.03132  |
| N | -1.17383 | 1.97785  | -0.22348 |
| H | -1.09279 | -0.09816 | -2.59635 |
| H | -2.78518 | -0.59232 | -2.75900 |
| H | -2.38263 | -2.71247 | -1.61272 |
| H | 0.69311  | -0.86477 | -1.78625 |
| H | -0.34910 | -3.33256 | 1.36148  |
| H | 0.12000  | -3.50528 | 3.07233  |
| H | 2.65389  | -1.01691 | 2.54911  |
| H | 2.18972  | -2.52622 | 3.30032  |
| H | -4.56962 | 4.43299  | 0.45430  |
| H | -5.01216 | 3.12943  | -0.66596 |
| H | -2.73760 | 1.89648  | -1.70068 |
| H | -0.40151 | 1.54400  | -0.72281 |
| H | -0.24789 | 2.42245  | 1.65038  |
| H | 5.20522  | 2.81568  | -1.57170 |
| H | -5.10324 | 2.87145  | 1.08547  |
| H | -1.17353 | -2.37496 | 2.59748  |
| H | -1.16025 | -0.90441 | 0.33189  |
| C | -3.20655 | -1.07781 | 0.22443  |
| H | -1.51559 | -1.48705 | -3.62058 |
| O | -4.19227 | -1.45478 | -0.41402 |
| C | -3.34495 | -0.42734 | 1.58560  |
| H | -2.41247 | 0.01731  | 1.94414  |
| H | -4.10837 | 0.35155  | 1.52923  |
| H | -3.68337 | -1.18352 | 2.30174  |
| H | 5.68218  | 1.85084  | 0.69741  |
| H | 2.27849  | -3.32909 | -1.79175 |
| H | 2.85636  | -1.64873 | -1.77399 |
| H | 2.31703  | -2.42707 | -0.26253 |
| H | 3.11053  | 2.40590  | -2.57144 |

Charge: 0 Point Group:  $C_1$

Total electronic energy = -1385.12824a.u.

Zero-point corrected total electronic energy ( $E_{ZPE}$ ) = - 1384.66917a.u.

No. of imaginary frequency = 1 (19.0i  $\text{cm}^{-1}$ , corresponding to methyl rotation)

**2 (keto-enol tautomer of uracil) hydrogen-bonded to His, Asn, and a fragment of protein backbone**

|   |          |          |          |
|---|----------|----------|----------|
| C | -2.52027 | 1.09279  | 0.61932  |
| N | -2.55745 | 0.22501  | -0.40913 |
| C | -3.74097 | -0.02361 | -1.11669 |
| C | -4.85996 | 0.75934  | -0.65652 |
| C | -4.69443 | 1.61836  | 0.38507  |
| N | -3.51344 | 1.79914  | 1.05695  |
| O | -1.31512 | 1.18698  | 1.21174  |
| O | -3.74715 | -0.84650 | -2.03110 |
| H | -1.69880 | -0.28139 | -0.71282 |
| N | 2.16048  | -1.05270 | 0.43283  |
| C | 1.86565  | -1.55443 | 1.76701  |
| C | 0.60399  | -2.41603 | 1.64167  |
| O | 0.66946  | -3.60362 | 1.34029  |
| C | 1.79655  | -0.43271 | 2.80685  |
| N | -0.58153 | -1.78733 | 1.82789  |
| C | -1.82927 | -2.44924 | 1.51154  |
| C | 0.78650  | -3.19105 | -1.89646 |
| C | -0.37353 | -2.23654 | -1.85151 |
| O | -0.27842 | -1.14343 | -1.25093 |
| N | -1.51518 | -2.60600 | -2.44015 |
| C | 4.27809  | 3.65602  | -0.69350 |
| C | 2.94764  | 3.00013  | -0.86194 |
| N | 2.30079  | 2.96638  | -2.07884 |
| C | 2.20192  | 2.34074  | 0.08012  |
| C | 1.19030  | 2.29605  | -1.87107 |
| N | 1.07905  | 1.89620  | -0.57861 |
| H | 1.08581  | 0.35127  | 2.51644  |
| H | 2.78492  | 0.02753  | 2.88838  |
| H | 2.67086  | -2.23949 | 2.04625  |
| H | -0.58907 | -0.78174 | 1.91736  |
| H | 0.92440  | -3.61610 | -0.89572 |
| H | 0.63901  | -4.00134 | -2.61497 |
| H | -2.34090 | -1.99866 | -2.39681 |



|   |          |          |          |
|---|----------|----------|----------|
| H | -1.59013 | -3.49582 | -2.90789 |
| H | 4.21773  | 4.72903  | -0.90605 |
| H | 4.65269  | 3.52455  | 0.32610  |
| H | 2.38739  | 2.11757  | 1.12002  |
| H | 0.33416  | 1.34671  | -0.17713 |
| H | 0.43882  | 2.06833  | -2.61469 |
| H | -5.52171 | 2.21986  | 0.74927  |
| H | 5.01150  | 3.22636  | -1.38461 |
| H | 1.69576  | -2.64229 | -2.15418 |
| H | 1.39589  | -0.96726 | -0.23271 |
| C | 3.43440  | -0.77783 | 0.03760  |
| H | 1.50871  | -0.82160 | 3.78916  |
| O | 4.38732  | -0.86298 | 0.80399  |
| C | 3.59717  | -0.38904 | -1.41757 |
| H | 2.64970  | -0.14613 | -1.90719 |
| H | 4.25899  | 0.47633  | -1.48344 |
| H | 4.07502  | -1.22021 | -1.94760 |
| H | -5.80989 | 0.63688  | -1.16071 |
| H | -1.84890 | -3.43742 | 1.97561  |
| H | -2.65658 | -1.85393 | 1.90495  |
| H | -1.95902 | -2.57723 | 0.43015  |
| H | -1.38327 | 1.89051  | 1.87822  |

Charge: 0 Point Group:  $C_1$

Total electronic energy = -1385.07518 a.u.

Zero-point corrected total electronic energy ( $E_{ZPE}$ ) = -1384.61660a.u.

No. of imaginary frequency = 1 (5.1i cm<sup>-1</sup>, corresponding to methyl rotation)

**2 (keto-enol tautomer of uracil) hydrogen-bonded to His, Asn, and a fragment of protein backbone in implicit solvation at  $\epsilon = 4.0$ , with IEF-PCM model**

|   |          |          |          |
|---|----------|----------|----------|
| C | 2.40948  | 1.39215  | -1.12586 |
| N | 2.58207  | 0.83071  | 0.08661  |
| C | 3.78810  | 0.94857  | 0.78400  |
| C | 4.78108  | 1.72616  | 0.09200  |
| C | 4.48904  | 2.25135  | -1.12916 |
| N | 3.28916  | 2.09078  | -1.77158 |
| O | 1.19696  | 1.16343  | -1.65916 |
| O | 3.91408  | 0.40663  | 1.88558  |
| H | 1.81069  | 0.29438  | 0.53612  |
| N | -1.91375 | -1.29887 | -0.23470 |

|   |          |          |          |
|---|----------|----------|----------|
| C | -1.59067 | -2.02583 | -1.45635 |
| C | -0.21141 | -2.66565 | -1.25234 |
| O | -0.09794 | -3.79920 | -0.78498 |
| C | -1.71592 | -1.15165 | -2.70583 |
| N | 0.85748  | -1.90872 | -1.57281 |
| C | 2.20686  | -2.32362 | -1.24666 |
| C | -0.16069 | -2.65989 | 2.39871  |
| C | 0.81391  | -1.55185 | 2.10857  |
| O | 0.52905  | -0.64959 | 1.28708  |
| N | 1.99527  | -1.57845 | 2.72764  |
| C | -4.65884 | 3.21954  | 0.00712  |
| C | -3.23788 | 2.80517  | 0.20460  |
| N | -2.54528 | 3.09798  | 1.36217  |
| C | -2.43368 | 2.09484  | -0.64823 |
| C | -1.34941 | 2.56923  | 1.20388  |
| N | -1.23210 | 1.95152  | 0.00447  |
| H | -1.10121 | -0.24627 | -2.63954 |
| H | -2.75726 | -0.83778 | -2.81611 |
| H | -2.29526 | -2.85703 | -1.53935 |
| H | 0.71344  | -0.94324 | -1.83265 |
| H | -0.25806 | -3.28136 | 1.50240  |
| H | 0.15005  | -3.28694 | 3.23719  |
| H | 2.70110  | -0.86255 | 2.52801  |
| H | 2.22239  | -2.31306 | 3.38079  |
| H | -4.76554 | 4.30776  | 0.07492  |
| H | -5.02589 | 2.89737  | -0.97181 |
| H | -2.61510 | 1.66735  | -1.62285 |
| H | -0.41218 | 1.48374  | -0.35670 |
| H | -0.54124 | 2.60089  | 1.92152  |
| H | 5.22222  | 2.84127  | -1.67018 |
| H | -5.30555 | 2.77828  | 0.77408  |
| H | -1.14174 | -2.22929 | 2.61508  |
| H | -1.14641 | -0.94012 | 0.33324  |
| C | -3.19135 | -1.13564 | 0.18698  |
| H | -1.42257 | -1.70761 | -3.60203 |
| O | -4.15539 | -1.54946 | -0.45997 |
| C | -3.36707 | -0.44012 | 1.51996  |
| H | -2.44983 | 0.03332  | 1.88045  |
| H | -4.14539 | 0.31970  | 1.42629  |
| H | -3.70156 | -1.17896 | 2.25594  |

|   |         |          |          |
|---|---------|----------|----------|
| H | 5.74328 | 1.87252  | 0.56573  |
| H | 2.39825 | -3.32210 | -1.64600 |
| H | 2.91037 | -1.62199 | -1.69798 |
| H | 2.36802 | -2.34830 | -0.16265 |
| H | 1.14868 | 1.64602  | -2.50194 |

Charge: 0 Point Group:  $C_1$

Total electronic energy = -1385.09886a.u.

Zero-point corrected total electronic energy ( $E_{ZPE}$ ) = -1384.63980a.u.

No. of imaginary frequency = 0

**3 (keto-enol tautomer of uracil) hydrogen-bonded to His, Asn, and a fragment of protein backbone**

|   |          |          |          |
|---|----------|----------|----------|
| C | -2.32101 | 1.12124  | 0.73330  |
| N | -2.40493 | 0.47730  | -0.51232 |
| C | -3.49839 | 0.55299  | -1.28900 |
| C | -4.58901 | 1.27674  | -0.87721 |
| C | -4.46245 | 1.88908  | 0.38683  |
| N | -3.40882 | 1.82635  | 1.16626  |
| O | -1.27461 | 1.01744  | 1.37462  |
| O | -3.39881 | -0.13316 | -2.44065 |
| H | -1.58658 | -0.07997 | -0.83274 |
| N | 2.16493  | -1.05348 | 0.43277  |
| C | 1.86059  | -1.55316 | 1.76513  |
| C | 0.59647  | -2.41022 | 1.63076  |
| O | 0.65964  | -3.59964 | 1.32055  |
| C | 1.79655  | -0.43266 | 2.80682  |
| N | -0.58365 | -1.78024 | 1.80910  |
| C | -1.82923 | -2.44924 | 1.51155  |
| C | 0.78650  | -3.19103 | -1.89647 |
| C | -0.34316 | -2.20287 | -1.92041 |
| O | -0.25385 | -1.09058 | -1.37675 |
| N | -1.48337 | -2.57890 | -2.53493 |
| C | 4.27805  | 3.65595  | -0.69346 |
| C | 2.93074  | 3.01252  | -0.62691 |
| N | 2.13921  | 2.86243  | -1.74555 |
| C | 2.28551  | 2.50142  | 0.47071  |
| C | 1.04183  | 2.27506  | -1.31952 |
| N | 1.07811  | 2.03333  | 0.01372  |

|   |          |          |          |
|---|----------|----------|----------|
| H | 1.05388  | 0.33107  | 2.55263  |
| H | 2.77684  | 0.04922  | 2.85778  |
| H | 2.66392  | -2.24279 | 2.03633  |
| H | -0.60998 | -0.77036 | 1.89715  |
| H | 0.88533  | -3.57858 | -0.87472 |
| H | 0.63613  | -4.02330 | -2.58862 |
| H | -2.25406 | -1.92516 | -2.59287 |
| H | -1.57148 | -3.47831 | -2.98046 |
| H | 4.19865  | 4.69215  | -1.04040 |
| H | 4.75806  | 3.65610  | 0.28982  |
| H | 2.57739  | 2.42397  | 1.50723  |
| H | 0.33366  | 1.62005  | 0.57041  |
| H | 0.19692  | 1.99527  | -1.93452 |
| H | -5.30144 | 2.46618  | 0.77252  |
| H | 4.93208  | 3.12439  | -1.39387 |
| H | 1.71700  | -2.67378 | -2.14238 |
| H | 1.39586  | -0.82385 | -0.18902 |
| C | 3.44346  | -0.85093 | 0.01681  |
| H | 1.55304  | -0.83374 | 3.79639  |
| O | 4.41117  | -1.05740 | 0.74112  |
| C | 3.59718  | -0.38905 | -1.41758 |
| H | 2.65139  | -0.10193 | -1.88589 |
| H | 4.27081  | 0.47003  | -1.44153 |
| H | 4.06216  | -1.19627 | -1.99377 |
| H | -5.48984 | 1.36231  | -1.47211 |
| H | -1.91337 | -3.37426 | 2.08784  |
| H | -2.65362 | -1.78474 | 1.78144  |
| H | -1.90448 | -2.70742 | 0.44686  |
| H | -4.18607 | 0.01330  | -2.98246 |

Charge: 0 Point Group:  $C_1$

Total electronic energy = -1385.06104 a.u.

Zero-point corrected total electronic energy ( $E_{ZPE}$ ) = -1384.60298a.u.

No. of imaginary frequency = 0

**3 (keto-enol tautomer of uracil) hydrogen-bonded to His, Asn, and a fragment of protein backbone in implicit solvation at  $\epsilon = 4.0$ , with IEF-PCM model**

|   |         |         |          |
|---|---------|---------|----------|
| C | 2.26092 | 1.22420 | -1.22684 |
| N | 2.50740 | 0.81169 | 0.08439  |
| C | 3.66527 | 1.07203 | 0.71889  |

|   |          |          |          |
|---|----------|----------|----------|
| C | 4.65932  | 1.76718  | 0.07093  |
| C | 4.36620  | 2.14899  | -1.24724 |
| N | 3.23806  | 1.90240  | -1.88667 |
| O | 1.16008  | 0.94929  | -1.72998 |
| O | 3.71573  | 0.59470  | 1.96509  |
| H | 1.76657  | 0.27203  | 0.57625  |
| N | -1.95693 | -1.21401 | -0.19715 |
| C | -1.70420 | -1.90847 | -1.45406 |
| C | -0.36123 | -2.63660 | -1.31126 |
| O | -0.31067 | -3.80601 | -0.91872 |
| C | -1.80764 | -0.97944 | -2.66584 |
| N | 0.74101  | -1.92182 | -1.59710 |
| C | 2.06924  | -2.44362 | -1.35579 |
| C | -0.22660 | -2.77958 | 2.33512  |
| C | 0.79736  | -1.70622 | 2.09323  |
| O | 0.54102  | -0.71657 | 1.38043  |
| N | 2.00724  | -1.86602 | 2.65006  |
| C | -4.41019 | 3.45125  | 0.28744  |
| C | -3.01142 | 2.92708  | 0.25975  |
| N | -2.15585 | 3.06982  | 1.33291  |
| C | -2.37264 | 2.25957  | -0.75426 |
| C | -1.02794 | 2.49695  | 0.96070  |
| N | -1.10776 | 1.99131  | -0.29154 |
| H | -1.11023 | -0.13768 | -2.60360 |
| H | -2.82315 | -0.57707 | -2.71677 |
| H | -2.45864 | -2.69325 | -1.54471 |
| H | 0.66636  | -0.92548 | -1.78345 |
| H | -0.39014 | -3.32204 | 1.39772  |
| H | 0.07519  | -3.48658 | 3.11071  |
| H | 2.71479  | -1.15021 | 2.53111  |
| H | 2.22032  | -2.65980 | 3.23467  |
| H | -4.42182 | 4.53445  | 0.45278  |
| H | -4.92141 | 3.24301  | -0.65713 |
| H | -2.70290 | 1.95223  | -1.73523 |
| H | -0.35424 | 1.53960  | -0.81003 |
| H | -0.13163 | 2.41900  | 1.56079  |
| H | 5.11926  | 2.69509  | -1.81131 |
| H | -4.98831 | 2.98930  | 1.09621  |
| H | -1.17263 | -2.31176 | 2.61843  |
| H | -1.16319 | -0.85168 | 0.32767  |

|   |          |          |          |
|---|----------|----------|----------|
| C | -3.20909 | -1.02663 | 0.28213  |
| H | -1.60374 | -1.52809 | -3.59109 |
| O | -4.21230 | -1.41590 | -0.32008 |
| C | -3.31038 | -0.33676 | 1.62581  |
| H | -2.36298 | 0.09603  | 1.95872  |
| H | -4.05589 | 0.45864  | 1.55943  |
| H | -3.65621 | -1.06523 | 2.36669  |
| H | 5.60633  | 1.99571  | 0.54221  |
| H | 2.19263  | -3.41342 | -1.84421 |
| H | 2.79814  | -1.74417 | -1.76970 |
| H | 2.26078  | -2.57284 | -0.28318 |
| H | 4.55085  | 0.83350  | 2.39394  |

Charge: 0      Point Group:  $C_1$

Total electronic energy = -1385.09257a.u.

Zero-point corrected total electronic energy ( $E_{ZPE}$ ) = -1384.63382a.u.

No. of imaginary frequency = 1 (16.3i cm<sup>-1</sup>, corresponding to methyl rotation)

#### **4 (dienol tautomer of uracil) hydrogen-bonded to His, Asn, and a fragment of protein backbone**

|   |          |          |          |
|---|----------|----------|----------|
| C | 2.49963  | 2.00861  | -0.98590 |
| N | 2.04605  | 1.09106  | -0.12741 |
| C | 2.88186  | 0.74781  | 0.85677  |
| C | 4.16507  | 1.30618  | 0.96698  |
| C | 4.50459  | 2.23613  | 0.00740  |
| N | 3.67987  | 2.60656  | -0.98637 |
| O | 1.62907  | 2.33363  | -1.94757 |
| O | 2.48479  | -0.14377 | 1.74716  |
| N | -1.74484 | -1.07243 | -0.71890 |
| C | -1.11877 | -1.40417 | -1.98918 |
| C | 0.09601  | -2.28170 | -1.66663 |
| O | 0.00079  | -3.50405 | -1.57796 |
| C | -0.82368 | -0.16388 | -2.83710 |
| N | 1.26524  | -1.64014 | -1.43876 |
| C | 2.42592  | -2.36776 | -0.97321 |
| C | -0.91163 | -3.49455 | 1.59551  |
| C | 0.19323  | -2.53505 | 1.92503  |
| O | 0.15458  | -1.34935 | 1.55366  |
| N | 1.25016  | -3.01217 | 2.61016  |

|   |          |          |          |
|---|----------|----------|----------|
| C | -4.14023 | 3.48933  | 0.44622  |
| C | -2.82494 | 2.82582  | 0.70574  |
| N | -2.38133 | 2.57703  | 1.98742  |
| C | -1.89650 | 2.38072  | -0.20141 |
| C | -1.21003 | 1.99638  | 1.84773  |
| N | -0.86868 | 1.85148  | 0.54286  |
| H | -0.19885 | 0.56460  | -2.30948 |
| H | -1.77313 | 0.32032  | -3.08224 |
| H | -1.81528 | -2.04754 | -2.53266 |
| H | 1.26506  | -0.63480 | -1.31967 |
| H | -0.82213 | -3.76519 | 0.53589  |
| H | -0.87962 | -4.40245 | 2.20310  |
| H | 2.03616  | -2.40903 | 2.81503  |
| H | 1.30366  | -3.97833 | 2.89233  |
| H | -4.17621 | 4.47742  | 0.91744  |
| H | -4.31238 | 3.60980  | -0.62758 |
| H | -1.88168 | 2.38015  | -1.28087 |
| H | -0.00092 | 1.45719  | 0.19346  |
| H | -0.57171 | 1.65754  | 2.65259  |
| H | 5.47722  | 2.72026  | 0.01947  |
| H | -4.96476 | 2.89815  | 0.86024  |
| H | -1.87285 | -2.99476 | 1.73269  |
| H | -1.15554 | -0.94805 | 0.09812  |
| C | -3.08695 | -0.88385 | -0.60023 |
| H | -0.32015 | -0.43922 | -3.76996 |
| O | -3.84839 | -0.95800 | -1.55787 |
| C | -3.57797 | -0.62191 | 0.80884  |
| H | -2.77846 | -0.34300 | 1.50104  |
| H | -4.31561 | 0.18237  | 0.78378  |
| H | -4.07836 | -1.52486 | 1.17618  |
| H | 4.83249  | 1.01793  | 1.76860  |
| H | 2.67821  | -3.16373 | -1.67820 |
| H | 3.26613  | -1.67323 | -0.90092 |
| H | 2.25285  | -2.82562 | 0.00799  |
| H | 2.04641  | 3.00920  | -2.50373 |
| H | 1.55559  | -0.47196 | 1.57196  |

Charge: 0 Point Group:  $C_1$

Total electronic energy = -1385.07115a.u.

Zero-point corrected total electronic energy ( $E_{ZPE}$ ) = -1384.61348a.u.

No. of imaginary frequency = 1 (9.8i cm<sup>-1</sup>, corresponding to methyl rotation)

**4 (dienol tautomer of uracil) hydrogen-bonded to His, Asn, and a fragment of protein backbone in implicit solvation at  $\epsilon = 4.0$ , with IEF-PCM model**

|   |          |          |          |
|---|----------|----------|----------|
| C | -2.48511 | 1.98050  | 1.04705  |
| N | -2.00655 | 1.10000  | 0.16165  |
| C | -2.81265 | 0.80183  | -0.86234 |
| C | -4.09088 | 1.36695  | -0.98743 |
| C | -4.46037 | 2.25271  | 0.00140  |
| N | -3.66517 | 2.57807  | 1.03680  |
| O | -1.63889 | 2.26178  | 2.04296  |
| O | -2.39013 | -0.04967 | -1.77973 |
| N | 1.74912  | -1.08635 | 0.72602  |
| C | 1.12265  | -1.40998 | 2.00153  |
| C | -0.10066 | -2.28871 | 1.70751  |
| O | -0.02286 | -3.51912 | 1.73307  |
| C | 0.82215  | -0.16413 | 2.83737  |
| N | -1.24311 | -1.64678 | 1.39507  |
| C | -2.42926 | -2.36455 | 0.97258  |
| C | 0.90794  | -3.49553 | -1.59473 |
| C | -0.16152 | -2.50166 | -1.94641 |
| O | -0.09515 | -1.32004 | -1.54895 |
| N | -1.20187 | -2.93476 | -2.67070 |
| C | 4.14411  | 3.48480  | -0.44524 |
| C | 2.82089  | 2.83603  | -0.70119 |
| N | 2.35916  | 2.60467  | -1.98149 |
| C | 1.89973  | 2.38455  | 0.20994  |
| C | 1.18401  | 2.02616  | -1.83395 |
| N | 0.86153  | 1.86937  | -0.52884 |
| H | 0.18308  | 0.54949  | 2.30812  |
| H | 1.76462  | 0.33757  | 3.07431  |
| H | 1.81751  | -2.04795 | 2.55236  |
| H | -1.22877 | -0.64557 | 1.23779  |
| H | 0.82215  | -3.72864 | -0.52755 |
| H | 0.83136  | -4.42097 | -2.16922 |
| H | -1.95649 | -2.30567 | -2.91332 |
| H | -1.26272 | -3.88911 | -2.99216 |
| H | 4.19341  | 4.47330  | -0.91490 |
| H | 4.31745  | 3.60445  | 0.62827  |
| H | 1.89644  | 2.37387  | 1.28956  |



|   |          |          |          |
|---|----------|----------|----------|
| H | -0.00809 | 1.47822  | -0.17435 |
| H | 0.53232  | 1.70081  | -2.63349 |
| H | -5.43253 | 2.73649  | -0.02040 |
| H | 4.96323  | 2.88417  | -0.85726 |
| H | 1.88729  | -3.04127 | -1.76153 |
| H | 1.15866  | -0.99530 | -0.09825 |
| C | 3.08396  | -0.89876 | 0.59818  |
| H | 0.32837  | -0.43823 | 3.77543  |
| O | 3.85801  | -0.97319 | 1.55467  |
| C | 3.57728  | -0.62585 | -0.80747 |
| H | 2.77167  | -0.37884 | -1.50411 |
| H | 4.28833  | 0.20244  | -0.78011 |
| H | 4.10617  | -1.51388 | -1.17017 |
| H | -4.73545 | 1.11545  | -1.81949 |
| H | -2.71378 | -3.10312 | 1.72577  |
| H | -3.24264 | -1.64622 | 0.85272  |
| H | -2.26753 | -2.88499 | 0.02142  |
| H | -2.06396 | 2.90830  | 2.62811  |
| H | -1.47510 | -0.40778 | -1.58888 |

Charge: 0 Point Group:  $C_1$

Total electronic energy = -1385.09523a.u.

Zero-point corrected total electronic energy ( $E_{ZPE}$ ) = -1384.63769a.u.

No. of imaginary frequency = 1 ( $4.8i$  cm<sup>-1</sup>, corresponding to methyl rotation)

### 1-methyl-uracil

|   |          |          |          |
|---|----------|----------|----------|
| C | -0.63627 | -0.86343 | 0.00000  |
| N | -1.08576 | 0.45218  | 0.00000  |
| C | -0.20356 | 1.50605  | 0.00000  |
| C | 1.13516  | 1.35109  | 0.00000  |
| C | 1.70701  | 0.01329  | 0.00000  |
| N | 0.73715  | -0.99895 | 0.00000  |
| H | -0.66493 | 2.48799  | 0.00000  |
| H | 1.80609  | 2.19918  | 0.00000  |
| O | -1.39871 | -1.81245 | 0.00000  |
| O | 2.89225  | -0.26584 | 0.00000  |
| C | -2.53158 | 0.64885  | 0.00000  |
| H | -2.97416 | 0.19001  | 0.88682  |
| H | -2.73641 | 1.72021  | 0.00000  |
| H | -2.97416 | 0.19001  | -0.88682 |
| H | 1.07856  | -1.95310 | 0.00000  |

Charge: 0 Point Group:  $C_s$

Total electronic energy = -454.00026 a.u.

Zero-point corrected total electronic energy ( $E_{ZPE}$ ) = -453.883767 a.u.

No. of imaginary frequency = 1 ( $72.4i$   $\text{cm}^{-1}$ , corresponding to methyl rotation)

**1-methyl-uracil (hydrogen-bonded to His, Asn, and a fragment of protein backbone)**

|   |          |          |          |
|---|----------|----------|----------|
| C | -1.92437 | -2.13969 | -0.81726 |
| N | -1.12372 | -0.99800 | -0.86980 |
| C | -1.48640 | 0.26840  | -0.49665 |
| C | -3.66418 | -0.62459 | -0.07937 |
| O | -1.43323 | -3.23853 | -1.09962 |
| O | -0.66551 | 1.19689  | -0.49008 |
| C | -6.95853 | 0.79423  | 0.81660  |
| O | -6.51414 | -0.38148 | 0.78496  |
| O | -6.33543 | 1.86641  | 0.63472  |
| C | 3.55449  | -2.12516 | -0.91251 |
| C | 2.08681  | -2.24805 | -1.24153 |
| O | 1.50468  | -1.34668 | -1.86099 |
| N | 1.44724  | -3.36604 | -0.85155 |
| C | 4.69592  | -0.58079 | 2.89755  |
| C | 3.34152  | -0.46794 | 2.27447  |
| N | 2.42855  | -1.49827 | 2.34166  |
| C | 2.81064  | 0.58272  | 1.56673  |
| C | 1.36816  | -1.06491 | 1.69032  |
| N | 1.54658  | 0.18534  | 1.20258  |
| H | 4.10505  | -1.93918 | -1.83917 |
| H | 3.68989  | -1.25761 | -0.25923 |
| H | 0.43119  | -3.43245 | -0.98921 |
| H | 1.88452  | -3.99643 | -0.19746 |
| H | 5.25547  | -1.41989 | 2.46729  |
| H | 5.27401  | 0.33511  | 2.73908  |
| H | 3.21496  | 1.54758  | 1.29546  |
| H | 0.88040  | 0.69952  | 0.62695  |
| H | 0.45183  | -1.61838 | 1.53510  |
| H | -4.69611 | -0.40553 | 0.24626  |
| H | 4.61618  | -0.75769 | 3.97605  |
| H | 3.96142  | -3.00824 | -0.41369 |
| N | -2.79125 | 0.43803  | -0.11568 |
| C | -3.27715 | -1.88224 | -0.41014 |
| H | -0.17216 | -1.09961 | -1.25883 |

|   |          |          |          |
|---|----------|----------|----------|
| H | -3.98124 | -2.70174 | -0.35841 |
| H | -8.05335 | 0.89337  | 1.03467  |
| C | -3.22185 | 1.77792  | 0.29875  |
| N | 1.75129  | 2.71353  | -0.92246 |
| C | 1.24435  | 3.76228  | -0.06240 |
| H | 1.74274  | 3.73996  | 0.91327  |
| H | 1.08972  | 2.02129  | -1.25311 |
| C | 3.07329  | 2.58763  | -1.18292 |
| O | 3.90447  | 3.37026  | -0.72077 |
| C | 3.46551  | 1.43382  | -2.08120 |
| H | 2.71776  | 0.63557  | -2.11436 |
| H | 3.62483  | 1.81568  | -3.09611 |
| H | 4.41536  | 1.02789  | -1.72366 |
| H | 1.41598  | 4.74945  | -0.50471 |
| H | 0.17428  | 3.59841  | 0.07365  |
| H | -2.95558 | 2.49668  | -0.47897 |
| H | -4.31054 | 1.77332  | 0.44888  |
| H | -2.70854 | 2.05536  | 1.22395  |

Charge: 0 Point Group:  $C_1$

Total electronic energy = -1366.33949 a.u.

Zero-point corrected total electronic energy ( $E_{ZPE}$ ) = -1365.91482 a.u.

No. of imaginary frequency = 1 ( $13.67i$   $\text{cm}^{-1}$ )

### 1-methyl-uracil : formate (reaction complex)

|   |          |          |          |
|---|----------|----------|----------|
| C | 1.32283  | -1.45363 | 0.00000  |
| N | 0.09827  | -0.81676 | 0.00000  |
| C | 0.00000  | 0.55455  | 0.00000  |
| C | 1.09075  | 1.36106  | 0.00000  |
| C | 2.41774  | 0.79756  | 0.00000  |
| N | 2.41338  | -0.60438 | 0.00000  |
| H | -1.02029 | 0.96890  | 0.00000  |
| H | 0.97499  | 2.43658  | 0.00000  |
| O | 1.45261  | -2.67159 | 0.00000  |
| O | 3.48905  | 1.39766  | 0.00000  |
| C | -1.10148 | -1.65707 | 0.00000  |
| H | -1.09703 | -2.29704 | 0.88645  |
| H | -1.99395 | -1.01744 | 0.00000  |
| H | -1.09703 | -2.29704 | -0.88645 |
| O | -2.66818 | 1.99670  | 0.00000  |
| C | -3.70300 | 1.28374  | 0.00000  |
| H | -4.67597 | 1.84420  | 0.00000  |

|   |          |          |         |
|---|----------|----------|---------|
| O | -3.79225 | 0.03385  | 0.00000 |
| H | 3.31678  | -1.06033 | 0.00000 |

Charge: -1 Point Group:  $C_s$

Total electronic energy = -643.19696 a.u.

Zero-point corrected total electronic energy ( $E_{ZPE}$ ) = -643.05831 a.u.

Sum of electronic and thermal Enthalpies ( $H$ ) = -643.04512 a.u.

Sum of electronic and thermal Free Energies ( $G$ ) = -643.10006 a.u.

No. of imaginary frequency = 0

### 1-methyl-uracil : formate (TS)

|   |          |          |          |
|---|----------|----------|----------|
| C | -0.65214 | 1.47755  | 0.00000  |
| N | 0.00000  | 0.27985  | 0.00000  |
| C | 1.34702  | 0.26473  | 0.00000  |
| C | 2.16030  | 1.36566  | 0.00000  |
| C | 1.55358  | 2.67097  | 0.00000  |
| N | 0.15930  | 2.61650  | 0.00000  |
| H | 1.78352  | -0.73473 | 0.00000  |
| H | 3.24005  | 1.28702  | 0.00000  |
| O | -1.87804 | 1.60370  | 0.00000  |
| O | 2.12887  | 3.76293  | 0.00000  |
| C | -0.99825 | -1.45828 | 0.00000  |
| H | -0.51733 | -1.71697 | 0.92861  |
| H | -1.93580 | -0.92572 | 0.00000  |
| H | -0.51733 | -1.71697 | -0.92861 |
| O | -1.97653 | -3.10634 | 0.00000  |
| C | -1.25006 | -4.16026 | 0.00000  |
| H | -1.84957 | -5.09994 | 0.00000  |
| O | -0.01842 | -4.23939 | 0.00000  |
| H | -0.32847 | 3.50334  | 0.00000  |

Charge: -1 Point Group:  $C_s$

Total electronic energy = -643.13646 a.u.

Zero-point corrected total electronic energy ( $E_{ZPE}$ ) = -642.99928 a.u.

Sum of electronic and thermal Enthalpies ( $H$ ) = -642.98659 a.u.

Sum of electronic and thermal Free Energies ( $G$ ) = -643.03978 a.u.

No. of imaginary frequency = 1 ( $616.56i$   $\text{cm}^{-1}$ )

### 1-methyl-uracil : formate (product)

|   |          |         |         |
|---|----------|---------|---------|
| C | -1.29438 | 0.36534 | 0.00000 |
| N | 0.00000  | 0.78355 | 0.00000 |

|   |          |          |          |
|---|----------|----------|----------|
| C | 0.20681  | 2.10965  | 0.00000  |
| C | -0.74532 | 3.10700  | 0.00000  |
| C | -2.12722 | 2.72954  | 0.00000  |
| N | -2.29652 | 1.34623  | 0.00000  |
| H | 1.26046  | 2.39866  | 0.00000  |
| H | -0.48579 | 4.15908  | 0.00000  |
| O | -1.64747 | -0.82507 | 0.00000  |
| O | -3.11886 | 3.47448  | 0.00000  |
| C | 1.41963  | -1.96471 | 0.00000  |
| H | 1.82050  | -1.47923 | 0.89051  |
| H | 0.33131  | -1.92508 | 0.00000  |
| H | 1.82050  | -1.47923 | -0.89051 |
| O | 1.78759  | -3.37165 | 0.00000  |
| C | 3.07223  | -3.66644 | 0.00000  |
| H | 3.19816  | -4.76076 | 0.00000  |
| O | 4.00243  | -2.89152 | 0.00000  |
| H | -3.24955 | 1.00599  | 0.00000  |

Charge: -1 Point Group:  $C_s$

Total electronic energy = -643.17198 a.u.

Zero-point corrected total electronic energy ( $E_{ZPE}$ ) = -643.03348 a.u.

Sum of electronic and thermal Enthalpies ( $H$ ) = -643.02018 a.u.

Sum of electronic and thermal Free Energies ( $G$ ) = -643.07691 a.u.

No. of imaginary frequency = 0

### Three water bound 1-methyl-uracil : formate (reaction complex)

|   |          |          |          |
|---|----------|----------|----------|
| C | -2.12744 | 0.63116  | -0.12685 |
| N | -2.88351 | -0.49299 | 0.09329  |
| C | -2.43751 | -1.80847 | 0.03685  |
| C | -1.02912 | -1.94520 | -0.20337 |
| C | -0.25756 | -0.84338 | -0.38180 |
| N | -0.78606 | 0.42321  | -0.34613 |
| O | -2.62145 | 1.76395  | -0.12791 |
| O | -3.24048 | -2.74064 | 0.18804  |
| H | 0.82536  | -0.91853 | -0.57611 |
| H | -0.59332 | -2.93401 | -0.25050 |
| H | -3.87564 | -0.33064 | 0.34709  |
| H | -4.31781 | 2.20560  | -0.45103 |
| O | -5.27999 | 2.39172  | -0.54185 |
| H | -5.45723 | 3.07859  | 0.11018  |
| O | -5.60637 | -0.04770 | 0.75107  |
| H | -5.99228 | -0.84077 | 0.32903  |

|   |          |          |          |
|---|----------|----------|----------|
| H | -5.78277 | 0.73198  | 0.18979  |
| H | -4.98722 | -2.72426 | -0.05762 |
| O | -5.96872 | -2.64992 | -0.12627 |
| H | -6.30494 | -3.16865 | 0.61269  |
| C | 0.06245  | 1.59508  | -0.58487 |
| H | -0.20896 | 2.05302  | -1.54036 |
| H | -0.10417 | 2.32499  | 0.20977  |
| H | 1.11474  | 1.28050  | -0.59409 |
| O | 2.65598  | -1.35879 | -0.92999 |
| C | 3.42173  | -0.37098 | -0.79487 |
| H | 4.51615  | -0.58715 | -0.91437 |
| O | 3.12218  | 0.81994  | -0.54553 |

Charge: -1 Point Group:  $C_1$

Total electronic energy = -872.45409 a.u.

Zero-point corrected total electronic energy ( $E_{ZPE}$ ) = -872.23733 a.u.

Sum of electronic and thermal Enthalpies ( $H$ ) = -872.21650 a.u.

Sum of electronic and thermal Free Energies ( $G$ ) = -872.28930 a.u.

No. of imaginary frequency = 0

### Three water bound 1-methyl-uracil : formate (TS)

|   |          |          |          |
|---|----------|----------|----------|
| C | -2.06139 | 0.57173  | -0.09243 |
| N | -2.88425 | -0.52691 | 0.11480  |
| C | -2.49751 | -1.85421 | 0.03819  |
| C | -1.09848 | -2.04693 | -0.20774 |
| C | -0.30863 | -0.94172 | -0.36353 |
| N | -0.74456 | 0.33153  | -0.31776 |
| O | -2.53919 | 1.71973  | -0.06648 |
| O | -3.33512 | -2.76498 | 0.17961  |
| H | 0.76018  | -1.04528 | -0.55033 |
| H | -0.70999 | -3.05500 | -0.27190 |
| H | -3.86434 | -0.32965 | 0.37572  |
| H | -4.18378 | 2.18505  | -0.41767 |
| O | -5.13872 | 2.41738  | -0.52479 |
| H | -5.28483 | 3.12568  | 0.11169  |
| O | -5.63628 | 0.01227  | 0.77508  |
| H | -6.01746 | -0.75356 | 0.30365  |
| H | -5.73158 | 0.80844  | 0.21585  |
| H | -5.06100 | -2.67150 | -0.08763 |
| O | -6.04239 | -2.57905 | -0.16317 |
| H | -6.38634 | -3.04308 | 0.60801  |

|   |          |         |          |
|---|----------|---------|----------|
| O | 3.46117  | 1.68470 | -1.07718 |
| C | 3.03367  | 2.84291 | -1.04956 |
| H | 3.74785  | 3.68382 | -1.20678 |
| O | 1.83154  | 3.23721 | -0.85808 |
| C | 0.56388  | 1.79764 | -0.59290 |
| H | 0.80381  | 1.39854 | -1.56428 |
| H | -0.21062 | 2.53948 | -0.48339 |
| H | 1.11938  | 1.45774 | 0.26531  |

Charge: -1 Point Group:  $C_1$

Total electronic energy = -872.39637 a.u.

Zero-point corrected total electronic energy ( $E_{ZPE}$ ) = -872.18141 a.u.

Sum of electronic and thermal Enthalpies ( $H$ ) = -872.16091 a.u.

Sum of electronic and thermal Free Energies ( $G$ ) = -872.23249 a.u.

No. of imaginary frequency = 1 ( $609.82i$   $\text{cm}^{-1}$ )

**Three water bound 1-methyl-uracil : formate (product)**

|   |          |          |          |
|---|----------|----------|----------|
| C | -0.04516 | -0.08018 | -0.19186 |
| N | 1.28675  | -0.48643 | -0.23103 |
| C | 1.73026  | -1.79347 | -0.13326 |
| C | 0.68029  | -2.75469 | -0.0602  |
| C | -0.61912 | -2.29779 | -0.07208 |
| N | -1.01758 | -1.01834 | -0.12851 |
| O | -0.29196 | 1.14862  | -0.21823 |
| O | 2.95646  | -2.04587 | -0.11725 |
| H | -1.43338 | -3.02311 | -0.02389 |
| H | 0.93125  | -3.80604 | 0.0094   |
| H | 1.99589  | 0.24635  | -0.37046 |
| H | 0.70294  | 2.41102  | 0.36576  |
| O | 1.30744  | 3.15961  | 0.61266  |
| H | 1.13784  | 3.82769  | -0.06059 |
| O | 3.33373  | 1.60543  | -0.50527 |
| H | 3.97736  | 1.13692  | 0.06081  |
| H | 2.8373   | 2.2417   | 0.0463   |
| H | 4.21913  | -0.99963 | 0.40248  |
| O | 4.95832  | -0.37286 | 0.61578  |
| H | 5.59589  | -0.51388 | -0.09269 |
| O | -6.24836 | 0.26576  | 0.21406  |
| C | -5.82973 | 1.39515  | 0.09746  |
| H | -6.47968 | 2.28375  | 0.07959  |
| O | -4.57039 | 1.76899  | -0.02589 |

|   |          |         |          |
|---|----------|---------|----------|
| C | -3.55982 | 0.72647 | -0.02234 |
| H | -2.59814 | 1.22435 | -0.12852 |
| H | -3.59983 | 0.17437 | 0.91746  |
| H | -3.72999 | 0.04137 | -0.85364 |

Charge: -1 Point Group:  $C_1$

Total electronic energy = -872.43533 a.u.

Zero-point corrected total electronic energy ( $E_{ZPE}$ ) = -872.21855 a.u.

Sum of electronic and thermal Enthalpies ( $H$ ) = -872.19765 a.u.

Sum of electronic and thermal Free Energies ( $G$ ) = -872.27217 a.u.

No. of imaginary frequency = 0

**Two glycine bound 1-methyl-uracil : formate (reactant)**

|   |          |          |          |
|---|----------|----------|----------|
| C | -1.40324 | -1.91849 | 0.00241  |
| N | -1.75402 | -0.59180 | 0.16630  |
| C | -3.03376 | -0.07513 | 0.10581  |
| C | -4.06126 | -1.02797 | -0.13184 |
| C | -3.74183 | -2.34304 | -0.28515 |
| N | -2.45127 | -2.78484 | -0.22177 |
| O | -0.23573 | -2.29271 | 0.05784  |
| O | -3.21956 | 1.15683  | 0.25798  |
| H | -4.53396 | -3.09183 | -0.46561 |
| H | -5.09196 | -0.70641 | -0.18915 |
| H | -0.97121 | 0.05736  | 0.32801  |
| N | 2.20518  | -0.72704 | 0.31440  |
| H | 1.66680  | 0.15359  | 0.39695  |
| H | 2.78414  | -0.88786 | 1.18290  |
| C | 3.28113  | -0.67499 | -0.71294 |
| H | 3.16137  | -1.50003 | -1.41674 |
| H | 3.21986  | 0.26884  | -1.25584 |
| C | 4.64431  | -0.80805 | 0.04716  |
| O | 5.65877  | -0.76434 | -0.65780 |
| O | 4.51175  | -0.94909 | 1.29661  |
| H | 1.50929  | -1.47009 | 0.18295  |
| N | -1.53480 | 3.08318  | 0.81446  |
| H | -2.03516 | 3.91184  | 1.13220  |
| H | -0.92250 | 2.70731  | 1.54933  |
| C | -0.67426 | 3.31230  | -0.37874 |
| H | -1.29975 | 3.31490  | -1.27251 |
| H | -0.16442 | 4.27386  | -0.28771 |
| C | 0.36933  | 2.16923  | -0.44759 |



|   |          |          |          |
|---|----------|----------|----------|
| O | 1.10918  | 2.14635  | -1.42381 |
| O | 0.32651  | 1.38016  | 0.55725  |
| H | -2.23130 | 2.28781  | 0.60758  |
| C | -2.13185 | -4.20795 | -0.39603 |
| H | -1.47272 | -4.32468 | -1.25935 |
| H | -1.61047 | -4.56882 | 0.49329  |
| H | -3.06943 | -4.75980 | -0.54629 |
| O | -6.21480 | -3.91126 | -0.72615 |
| C | -5.96489 | -5.13714 | -0.85749 |
| H | -6.85034 | -5.79649 | -1.04433 |
| O | -4.85109 | -5.70931 | -0.80660 |

Charge: -1 Point Group:  $C_1$

Total electronic energy = -1211.93926 a.u.

Zero-point corrected total electronic energy ( $E_{ZPE}$ ) = -1211.63152 a.u.

Sum of electronic and thermal Enthalpies (H) = -1211.60669 a.u.

Sum of electronic and thermal Free Energies (G) = -1211.69016 a.u.

No. of imaginary frequency = 1 ( $5.22i \text{ cm}^{-1}$ )

### Two glycine bound 1-methyl-uracil : formate (TS)

|   |          |          |          |
|---|----------|----------|----------|
| C | -1.44424 | -1.87628 | -0.08023 |
| N | -1.75944 | -0.52709 | 0.10953  |
| C | -3.02232 | 0.01759  | 0.05681  |
| C | -4.06882 | -0.90508 | -0.20801 |
| C | -3.73474 | -2.22517 | -0.37863 |
| N | -2.48847 | -2.71499 | -0.32207 |
| O | -0.27014 | -2.24852 | -0.02089 |
| O | -3.19459 | 1.25363  | 0.23831  |
| H | -4.50526 | -2.96965 | -0.57695 |
| H | -5.08924 | -0.55126 | -0.26545 |
| H | -0.96367 | 0.09870  | 0.28540  |
| N | 2.17662  | -0.75588 | 0.24769  |
| H | 1.67873  | 0.14429  | 0.36576  |
| H | 2.75210  | -0.96331 | 1.10502  |
| C | 3.24233  | -0.70396 | -0.78927 |
| H | 3.11210  | -1.52704 | -1.49382 |
| H | 3.18097  | 0.24181  | -1.32901 |
| C | 4.61469  | -0.84669 | -0.04815 |
| O | 5.62077  | -0.77884 | -0.76487 |
| O | 4.50061  | -1.02020 | 1.19834  |
| H | 1.44314  | -1.46239 | 0.09888  |

|   |          |          |          |
|---|----------|----------|----------|
| N | -1.46594 | 3.08029  | 0.92783  |
| H | -1.92642 | 3.89123  | 1.33687  |
| H | -0.83907 | 2.61458  | 1.59969  |
| C | -0.62494 | 3.38499  | -0.26114 |
| H | -1.26097 | 3.44113  | -1.14532 |
| H | -0.11021 | 4.33761  | -0.11810 |
| C | 0.41580  | 2.24443  | -0.40909 |
| O | 1.12790  | 2.26281  | -1.40598 |
| O | 0.39660  | 1.41624  | 0.56370  |
| H | -2.19349 | 2.32329  | 0.66754  |
| O | -4.41857 | -6.58015 | -0.95477 |
| C | -3.31094 | -7.13102 | -0.92852 |
| H | -3.25963 | -8.23586 | -1.05948 |
| O | -2.16666 | -6.58580 | -0.76523 |
| C | -2.29586 | -4.63324 | -0.54119 |
| H | -2.79425 | -4.58912 | -1.49507 |
| H | -2.87903 | -4.80722 | 0.34747  |
| H | -1.21908 | -4.60648 | -0.48650 |

Charge: -1 Point Group:  $C_1$

Total electronic energy = -1211.88319 a.u.

Zero-point corrected total electronic energy ( $E_{ZPE}$ ) = -1211.57680 a.u.

Sum of electronic and thermal Enthalpies ( $H$ ) = -1211.55149 a.u.

Sum of electronic and thermal Free Energies ( $G$ ) = -1211.63710 a.u.

No. of imaginary frequency = 1 (602.47i  $\text{cm}^{-1}$ )

### Two glycine bound 1-methyl-uracil : formate (product)

|   |          |          |          |
|---|----------|----------|----------|
| C | -1.38221 | -0.65117 | -0.02125 |
| N | -0.43469 | -1.67903 | -0.14482 |
| C | -0.69526 | -3.01913 | 0.02250  |
| C | -2.03506 | -3.33159 | 0.33130  |
| C | -2.93394 | -2.28286 | 0.42967  |
| N | -2.66392 | -0.98799 | 0.26733  |
| O | -1.00342 | 0.52022  | -0.18662 |
| O | 0.23425  | -3.87617 | -0.10373 |
| H | -3.97609 | -2.50525 | 0.66296  |
| H | -2.32075 | -4.36511 | 0.47833  |
| H | 0.52309  | -1.38616 | -0.36034 |
| N | 1.57681  | 1.67922  | -0.37785 |
| H | 2.09825  | 0.79484  | -0.50966 |

|   |          |          |          |
|---|----------|----------|----------|
| H | 1.73205  | 2.31942  | -1.19494 |
| C | 2.09986  | 2.51088  | 0.73851  |
| H | 1.29120  | 2.74506  | 1.43293  |
| H | 2.87665  | 1.95844  | 1.26904  |
| C | 2.67185  | 3.82868  | 0.11863  |
| O | 3.16728  | 4.62813  | 0.92470  |
| O | 2.54295  | 3.90076  | -1.13579 |
| H | 0.58444  | 1.40259  | -0.29107 |
| N | 2.66780  | -3.50907 | -0.84444 |
| H | 3.05759  | -4.38089 | -1.19667 |
| H | 2.63635  | -2.78159 | -1.57275 |
| C | 3.42667  | -2.91149 | 0.28468  |
| H | 3.09871  | -3.36818 | 1.21955  |
| H | 4.49717  | -3.08297 | 0.15046  |
| C | 3.13946  | -1.38737 | 0.29882  |
| O | 3.60220  | -0.74174 | 1.23462  |
| O | 2.44695  | -0.99199 | -0.69666 |
| H | 1.61843  | -3.65340 | -0.54855 |
| O | -6.82901 | 2.31711  | 0.05098  |
| C | -6.00231 | 3.18487  | -0.11412 |
| H | -6.25200 | 4.24770  | -0.25018 |
| O | -4.69110 | 3.03164  | -0.16204 |
| C | -4.17447 | 1.68999  | 0.00113  |
| H | -3.09294 | 1.76619  | -0.08180 |
| H | -4.45667 | 1.29688  | 0.97873  |
| H | -4.57136 | 1.03878  | -0.77903 |

Charge: -1 Point Group:  $C_1$

Total electronic energy = -1211.92929 a.u.

Zero-point corrected total electronic energy ( $E_{ZPE}$ ) = -1211.622169 a.u.

Sum of electronic and thermal Enthalpies (H) = -1211.596191 a.u.

Sum of electronic and thermal Free Energies (G) = -1211.685003 a.u.

No. of imaginary frequency = 0

Optimized Cartesian coordinates for stationary points on the stepwise reaction pathway of glycosidic N1-C1' bond cleavage, using a constrained and truncated QM model. All geometries were optimized in the gas-phase at  $\omega$ B97X-D/6-31+G(d).

**Reaction complex (RC)**

|   |          |          |          |
|---|----------|----------|----------|
| C | -1.29532 | 0.16691  | -0.34553 |
| N | -1.92897 | 0.24983  | -1.56309 |
| C | -1.34587 | 0.09081  | -2.81086 |
| C | 0.04417  | -0.28940 | -2.76972 |
| C | 0.70034  | -0.28251 | -1.58773 |
| N | 0.07867  | -0.00738 | -0.39837 |
| O | -1.91135 | 0.23439  | 0.71030  |
| O | -2.00505 | 0.27709  | -3.83897 |
| C | 0.86404  | 0.40308  | 0.80775  |
| C | 0.60611  | -0.44386 | 2.05581  |
| C | 1.99584  | -0.70397 | 2.65020  |
| C | 2.94033  | -0.49184 | 1.47654  |
| O | 2.39970  | 0.08833  | 3.72907  |
| O | 2.22530  | 0.25105  | 0.48463  |
| C | 3.38578  | -1.83638 | 1.02733  |
| O | 4.26269  | -1.81354 | -0.09708 |
| P | 5.28532  | -3.17311 | -0.51525 |
| N | -3.81211 | 2.73365  | 1.15767  |
| C | -4.05504 | 2.60687  | 2.59005  |
| C | -3.17459 | 1.60674  | 3.34399  |
| C | -1.61099 | 5.35547  | 1.07633  |
| C | -0.48415 | 4.33376  | 0.93885  |
| O | 0.69504  | 4.81250  | 0.89923  |
| O | -0.77777 | 3.11853  | 0.90645  |
| C | 5.83462  | 5.01493  | -0.78953 |
| C | 5.69612  | 3.51548  | -0.86549 |
| N | 4.58637  | 2.84140  | -0.38112 |
| C | 6.51645  | 2.55322  | -1.38985 |
| C | 4.72194  | 1.53867  | -0.60299 |
| N | 5.88590  | 1.33318  | -1.21262 |
| C | -2.43556 | -4.29389 | -4.74974 |
| C | -3.11388 | -3.83590 | -3.48013 |
| C | -3.64610 | -2.54705 | -3.37885 |
| C | -3.24215 | -4.69483 | -2.38372 |

|   |          |          |          |
|---|----------|----------|----------|
| C | -4.29086 | -2.12473 | -2.21713 |
| C | -3.88740 | -4.28029 | -1.22002 |
| C | -4.41357 | -2.99189 | -1.13298 |
| C | -5.51366 | 3.54863  | -2.08775 |
| C | -4.66695 | 2.33353  | -2.40539 |
| O | -4.62487 | 1.36576  | -1.63694 |
| N | -3.97385 | 2.34857  | -3.56120 |
| C | -2.72359 | -4.28906 | 5.33427  |
| C | -2.58189 | -3.54895 | 4.03965  |
| N | -2.48808 | -4.22022 | 2.84017  |
| C | -2.52576 | -2.19390 | 3.81878  |
| C | -2.37617 | -3.28356 | 1.92146  |
| N | -2.40201 | -2.03964 | 2.45780  |
| O | 2.74964  | 3.45427  | 1.41186  |
| H | -2.93058 | 0.48384  | -1.52954 |
| H | 0.62507  | 1.46238  | 0.95564  |
| H | 0.14717  | -1.39713 | 1.78105  |
| H | -0.05974 | 0.05914  | 2.75898  |
| H | 2.05728  | -1.72679 | 3.02666  |
| H | 3.79539  | 0.11760  | 1.78752  |
| H | 2.29923  | 1.02067  | 3.48939  |
| H | 2.50144  | -2.45100 | 0.78746  |
| H | 3.90284  | -2.31219 | 1.87302  |
| H | -4.17511 | 1.92563  | 0.65901  |
| H | -2.79963 | 2.73712  | 0.99054  |
| H | -2.11927 | 1.82681  | 3.15369  |
| H | -3.38428 | 0.59600  | 2.98438  |
| H | -1.74944 | 5.57495  | 2.14218  |
| H | -1.34238 | 6.29189  | 0.57886  |
| H | 5.80717  | 5.35564  | 0.24997  |
| H | 6.78441  | 5.32284  | -1.23255 |
| H | 3.80373  | 3.21851  | 0.23689  |
| H | 7.47923  | 2.63427  | -1.86884 |
| H | 3.99717  | 0.77566  | -0.35666 |
| H | -1.95727 | -3.45516 | -5.26606 |
| H | -3.16007 | -4.74036 | -5.44259 |
| H | -3.53197 | -1.85142 | -4.20639 |
| H | -2.82013 | -5.69654 | -2.43589 |
| H | -4.68397 | -1.11293 | -2.15528 |
| H | -3.96579 | -4.95774 | -0.37327 |

|   |          |          |          |
|---|----------|----------|----------|
| H | -4.89960 | -2.66159 | -0.21877 |
| H | -5.19303 | 3.92796  | -1.11121 |
| H | -5.43757 | 4.33891  | -2.83974 |
| H | -3.93243 | 3.17963  | -4.12880 |
| H | -3.32813 | 1.57856  | -3.76848 |
| H | -1.90203 | -5.00194 | 5.46329  |
| H | -2.71798 | -3.59851 | 6.18408  |
| H | -2.56189 | -1.34758 | 4.48924  |
| H | -2.27487 | -3.45004 | 0.85758  |
| H | 1.85342  | 3.91885  | 1.14547  |
| H | 3.06181  | 3.97120  | 2.16355  |
| H | -1.66807 | -5.04701 | -4.54301 |
| H | -3.66085 | -4.85676 | 5.35933  |
| H | 5.01867  | 5.50418  | -1.32957 |
| H | 6.22565  | 0.39675  | -1.43402 |
| H | -6.55771 | 3.23537  | -1.99618 |
| H | -2.55216 | 4.96682  | 0.68037  |
| H | -3.36033 | 1.65314  | 4.42216  |
| H | 1.75812  | -0.49883 | -1.50314 |
| H | 0.55025  | -0.52388 | -3.69605 |
| H | -2.29802 | -1.16855 | 1.93805  |
| O | 6.27533  | -2.21215 | -1.47203 |
| O | 5.99063  | -3.58190 | 0.73084  |
| O | 4.55029  | -4.08512 | -1.44324 |
| H | 6.13836  | -2.54032 | -2.37071 |
| H | -5.11255 | 2.31555  | 2.71457  |
| C | -4.00607 | 3.99543  | 3.20533  |
| O | -3.66140 | 4.25454  | 4.33742  |
| H | -4.35112 | 4.79638  | 2.51817  |

Charge: -1 Point Group:  $C_1$

Total electronic energy = -2968.22362 a.u.

Zero-point corrected total electronic energy ( $E_{ZPE}$ ) = -2967.37893 a.u.

No. of imaginary frequency = 5 ( $58.6i$   $\text{cm}^{-1}$ ,  $35.63i$   $\text{cm}^{-1}$ ,  $24.63i$   $\text{cm}^{-1}$ ,  $22.02i$   $\text{cm}^{-1}$ ,  $1.22i$   $\text{cm}^{-1}$ )

### Transition State 1 (TS1)

|   |          |          |          |
|---|----------|----------|----------|
| C | -1.44533 | -0.14575 | -0.39928 |
| N | -2.14244 | 0.00051  | -1.57288 |
| C | -1.65287 | -0.27459 | -2.84201 |
| C | -0.30907 | -0.80497 | -2.85239 |

|   |          |          |          |
|---|----------|----------|----------|
| C | 0.38105  | -0.87288 | -1.68692 |
| N | -0.14509 | -0.55933 | -0.46413 |
| O | -2.00057 | 0.10945  | 0.68404  |
| O | -2.34270 | -0.03438 | -3.83841 |
| C | 1.08548  | 0.73824  | 0.51657  |
| C | 0.76814  | 0.67566  | 1.96779  |
| C | 1.82903  | -0.28216 | 2.53371  |
| C | 2.90964  | -0.34133 | 1.42668  |
| O | 2.34336  | 0.10174  | 3.79046  |
| O | 2.30588  | 0.31648  | 0.26628  |
| C | 3.38982  | -1.72862 | 1.05614  |
| O | 4.33901  | -1.64714 | 0.01015  |
| P | 5.32786  | -2.98828 | -0.50340 |
| N | -4.74284 | 0.42345  | 1.78956  |
| C | -4.45522 | 1.69965  | 2.45141  |
| C | -3.23251 | 1.56410  | 3.37960  |
| C | -1.72367 | 5.39186  | 1.26675  |
| C | -0.48301 | 4.72537  | 0.67446  |
| O | -0.24000 | 4.94389  | -0.54162 |
| O | 0.23893  | 4.01605  | 1.44922  |
| C | 5.73680  | 5.21248  | -0.54148 |
| C | 5.69700  | 3.70686  | -0.63968 |
| N | 4.50774  | 3.00224  | -0.71324 |
| C | 6.69083  | 2.76524  | -0.68323 |
| C | 4.76074  | 1.70103  | -0.79912 |
| N | 6.08040  | 1.52609  | -0.78168 |
| C | -2.32947 | -4.12120 | -4.84868 |
| C | -2.58929 | -3.78770 | -3.39690 |
| C | -3.73367 | -3.06955 | -3.02924 |
| C | -1.70321 | -4.17680 | -2.39036 |
| C | -3.99333 | -2.76599 | -1.69620 |
| C | -1.95823 | -3.87487 | -1.05152 |
| C | -3.10780 | -3.17456 | -0.69834 |
| C | -5.57066 | 3.58885  | -1.99963 |
| C | -4.78143 | 2.32223  | -2.26924 |
| O | -4.71681 | 1.41866  | -1.42662 |
| N | -4.16822 | 2.21493  | -3.46551 |
| C | -2.71855 | -4.41678 | 5.22800  |
| C | -2.21344 | -3.60098 | 4.07642  |
| N | -1.05851 | -3.94805 | 3.40974  |

|   |          |          |          |
|---|----------|----------|----------|
| C | -2.74770 | -2.46259 | 3.52070  |
| C | -0.90609 | -3.03387 | 2.47500  |
| N | -1.89725 | -2.10960 | 2.50000  |
| O | 2.01128  | 3.58914  | -0.40771 |
| H | -3.10489 | 0.35770  | -1.49497 |
| H | 0.76189  | 1.55750  | -0.11642 |
| H | -0.26567 | 0.39031  | 2.15602  |
| H | 0.88860  | 1.70216  | 2.34888  |
| H | 1.40443  | -1.27611 | 2.69487  |
| H | 3.76806  | 0.28594  | 1.69507  |
| H | 2.56473  | 1.04203  | 3.76637  |
| H | 2.52447  | -2.33840 | 0.75087  |
| H | 3.82773  | -2.18453 | 1.95608  |
| H | -5.53484 | 0.53348  | 1.15975  |
| H | -3.94554 | 0.17953  | 1.20000  |
| H | -2.46334 | 2.31533  | 3.16190  |
| H | -2.77059 | 0.58164  | 3.25499  |
| H | -1.52006 | 6.46206  | 1.38915  |
| H | -2.57320 | 5.29291  | 0.58589  |
| H | 5.16629  | 5.55585  | 0.32645  |
| H | 6.76974  | 5.55324  | -0.44072 |
| H | 3.50352  | 3.37825  | -0.63452 |
| H | 7.76347  | 2.87202  | -0.64965 |
| H | 4.02718  | 0.90747  | -0.84837 |
| H | -2.33407 | -3.21237 | -5.46167 |
| H | -3.10190 | -4.79243 | -5.24299 |
| H | -4.41982 | -2.72713 | -3.80085 |
| H | -0.79623 | -4.71775 | -2.65173 |
| H | -4.88005 | -2.19385 | -1.43545 |
| H | -1.25783 | -4.19164 | -0.28382 |
| H | -3.30638 | -2.94265 | 0.34444  |
| H | -5.20089 | 4.04297  | -1.07549 |
| H | -5.51560 | 4.31264  | -2.81778 |
| H | -4.13617 | 2.99482  | -4.10222 |
| H | -3.58499 | 1.39519  | -3.66825 |
| H | -1.97206 | -4.45823 | 6.02902  |
| H | -3.63999 | -3.98876 | 5.63653  |
| H | -3.63863 | -1.88947 | 3.73524  |
| H | -0.10887 | -3.00053 | 1.74377  |
| H | 1.33230  | 4.13254  | -0.88440 |



|   |          |          |          |
|---|----------|----------|----------|
| H | 1.56699  | 3.65945  | 0.49083  |
| H | -1.35962 | -4.61235 | -4.97649 |
| H | -2.92440 | -5.44663 | 4.91541  |
| H | 5.30133  | 5.66833  | -1.43557 |
| H | 6.50792  | 0.60002  | -0.81038 |
| H | -6.61661 | 3.31679  | -1.82983 |
| H | -1.97713 | 4.96913  | 2.24201  |
| H | -3.51938 | 1.67137  | 4.42965  |
| H | 1.42140  | -1.19200 | -1.66426 |
| H | 0.12912  | -1.09220 | -3.79906 |
| H | -1.99024 | -1.31267 | 1.86673  |
| O | 6.43707  | -1.96187 | -1.23211 |
| O | 5.90066  | -3.59749 | 0.72715  |
| O | 4.62810  | -3.71622 | -1.60454 |
| H | 6.38068  | -2.16307 | -2.17565 |
| H | -5.34247 | 1.99812  | 3.02020  |
| C | -4.20520 | 2.78221  | 1.41837  |
| O | -4.91572 | 3.75476  | 1.25985  |
| H | -3.31810 | 2.61523  | 0.77421  |

Charge: -1 Point Group:  $C_1$

Total electronic energy = -2968.19049 a.u.

Zero-point corrected total electronic energy ( $E_{ZPE}$ ) = -2967.35032 a.u.

No. of imaginary frequency = 6 (236.81i cm<sup>-1</sup>, corresponding to N1-C1' bond cleavage, and 74.81i cm<sup>-1</sup>, 48.25i cm<sup>-1</sup>, 30.50i cm<sup>-1</sup>, 13.64i cm<sup>-1</sup>, 6.12i cm<sup>-1</sup>)

### Intermediate (INT)

|   |          |          |          |
|---|----------|----------|----------|
| C | -1.74014 | -0.45001 | -0.45558 |
| N | -2.41082 | -0.03891 | -1.59030 |
| C | -2.01658 | -0.30767 | -2.89186 |
| C | -0.80395 | -1.06372 | -2.98058 |
| C | -0.16047 | -1.41645 | -1.82376 |
| N | -0.58099 | -1.12578 | -0.56863 |
| O | -2.22996 | -0.14754 | 0.66324  |
| O | -2.69469 | 0.12031  | -3.84501 |
| C | 1.14073  | 0.75099  | 0.46848  |
| C | 0.78803  | 0.65853  | 1.88692  |
| C | 1.91125  | -0.20717 | 2.48651  |
| C | 2.89446  | -0.41358 | 1.31649  |
| O | 2.54624  | 0.33432  | 3.61963  |
| O | 2.22811  | 0.20531  | 0.14051  |

|   |          |          |          |
|---|----------|----------|----------|
| C | 3.20646  | -1.85213 | 1.01694  |
| O | 4.12208  | -1.94756 | -0.04775 |
| P | 4.88959  | -3.45504 | -0.51636 |
| N | -4.49098 | 1.49439  | 1.71935  |
| C | -3.46117 | 2.48860  | 2.01131  |
| C | -2.88958 | 2.31639  | 3.41344  |
| C | -1.14531 | 5.74478  | 0.79719  |
| C | 0.21909  | 5.10274  | 0.76929  |
| O | 0.54061  | 4.60285  | -0.42057 |
| O | 0.97026  | 5.08061  | 1.72978  |
| C | 6.12136  | 4.61042  | -1.42300 |
| C | 6.06049  | 3.10807  | -1.39424 |
| N | 4.97279  | 2.43206  | -0.87427 |
| C | 6.97709  | 2.19348  | -1.84693 |
| C | 5.22898  | 1.14349  | -1.01948 |
| N | 6.43004  | 0.95264  | -1.59941 |
| C | -3.13190 | -4.17010 | -4.25039 |
| C | -3.53057 | -3.60956 | -2.90402 |
| C | -4.58178 | -2.69269 | -2.79664 |
| C | -2.86751 | -3.99309 | -1.73515 |
| C | -4.96826 | -2.18588 | -1.55809 |
| C | -3.25090 | -3.49115 | -0.49195 |
| C | -4.30763 | -2.58921 | -0.39859 |
| C | -5.36668 | 4.08126  | -2.01758 |
| C | -4.76835 | 2.70594  | -2.25691 |
| O | -4.78410 | 1.85772  | -1.35743 |
| N | -4.21240 | 2.46672  | -3.45524 |
| C | -2.83021 | -3.44505 | 5.80727  |
| C | -2.24369 | -3.03494 | 4.49571  |
| N | -1.18644 | -3.71125 | 3.93111  |
| C | -2.62785 | -2.00334 | 3.67472  |
| C | -0.94762 | -3.09311 | 2.79017  |
| N | -1.78880 | -2.05186 | 2.59042  |
| O | 2.65368  | 3.16582  | 0.42521  |
| H | -3.30322 | 0.44244  | -1.45418 |
| H | 0.60029  | 1.29759  | -0.29627 |
| H | -0.22520 | 0.25077  | 1.97919  |
| H | 0.73858  | 1.67733  | 2.29488  |
| H | 1.51271  | -1.16958 | 2.81547  |
| H | 3.80917  | 0.17191  | 1.44308  |

|   |          |          |          |
|---|----------|----------|----------|
| H | 2.84890  | 1.23013  | 3.41699  |
| H | 2.26933  | -2.38503 | 0.78833  |
| H | 3.62201  | -2.27914 | 1.94390  |
| H | -4.93193 | 1.71413  | 0.82647  |
| H | -4.02245 | 0.60329  | 1.55634  |
| H | -2.14042 | 3.08235  | 3.63460  |
| H | -2.40520 | 1.33725  | 3.50558  |
| H | -1.77864 | 5.35888  | -0.00319 |
| H | -1.60326 | 5.56134  | 1.77069  |
| H | 6.09343  | 5.02457  | -0.40891 |
| H | 7.04198  | 4.95101  | -1.90614 |
| H | 3.52904  | 2.99573  | -0.02152 |
| H | 7.94282  | 2.31556  | -2.31354 |
| H | 4.60041  | 0.30505  | -0.74625 |
| H | -3.10873 | -3.38168 | -5.01077 |
| H | -3.84358 | -4.93582 | -4.58369 |
| H | -5.08491 | -2.34988 | -3.69819 |
| H | -2.02887 | -4.68327 | -1.79623 |
| H | -5.76939 | -1.45348 | -1.50100 |
| H | -2.71232 | -3.79030 | 0.40297  |
| H | -4.58901 | -2.17932 | 0.56726  |
| H | -4.73060 | 4.61445  | -1.30307 |
| H | -5.45627 | 4.68282  | -2.92687 |
| H | -4.15890 | 3.18937  | -4.15531 |
| H | -3.72162 | 1.57180  | -3.62968 |
| H | -2.06834 | -3.44108 | 6.59507  |
| H | -3.63566 | -2.76484 | 6.10406  |
| H | -3.40899 | -1.26083 | 3.75939  |
| H | -0.19007 | -3.36787 | 2.06783  |
| H | 1.38554  | 4.09159  | -0.31296 |
| H | 2.77119  | 3.80604  | 1.14199  |
| H | -2.13966 | -4.63027 | -4.20912 |
| H | -3.24079 | -4.46000 | 5.75245  |
| H | 5.26927  | 5.02166  | -1.97474 |
| H | 6.82683  | 0.03962  | -1.78300 |
| H | -6.35195 | 3.96181  | -1.56057 |
| H | -1.03008 | 6.82691  | 0.66834  |
| H | -3.69738 | 2.37067  | 4.14833  |
| H | 0.77495  | -1.97265 | -1.87224 |
| H | -0.42248 | -1.32960 | -3.95819 |

|   |          |          |          |
|---|----------|----------|----------|
| H | -1.84202 | -1.42030 | 1.77992  |
| O | 5.82738  | -2.72480 | -1.67441 |
| O | 5.73447  | -3.88223 | 0.63106  |
| O | 3.85719  | -4.28510 | -1.20951 |
| H | 5.37649  | -2.88217 | -2.51452 |
| H | -3.94294 | 3.47961  | 1.94411  |
| C | -2.36556 | 2.51919  | 0.95655  |
| O | -1.18649 | 2.69917  | 1.18833  |
| H | -2.72129 | 2.40692  | -0.08502 |

Charge: -1 Point Group:  $C_1$

Total electronic energy = -2968.19461 a.u.

Zero-point corrected total electronic energy ( $E_{ZPE}$ ) = -2967.35378 a.u.

No. of imaginary frequency = 5 ( $54.77i$   $\text{cm}^{-1}$ ,  $54.13i$   $\text{cm}^{-1}$ ,  $18.67i$   $\text{cm}^{-1}$ ,  $15.29i$   $\text{cm}^{-1}$ ,  $5.01i$   $\text{cm}^{-1}$ )

### Transition State 2 (TS2)

|   |          |          |          |
|---|----------|----------|----------|
| C | -1.02839 | 0.38773  | 1.17240  |
| N | -1.35422 | -0.37112 | 2.28292  |
| C | -0.44267 | -0.91358 | 3.17559  |
| C | 0.91731  | -0.61005 | 2.85782  |
| C | 1.18143  | 0.13842  | 1.73724  |
| N | 0.26058  | 0.62523  | 0.87653  |
| O | -1.97114 | 0.81392  | 0.45437  |
| O | -0.84917 | -1.60579 | 4.13066  |
| C | 0.75532  | -1.07028 | -1.49301 |
| C | -0.15026 | -0.19659 | -2.29234 |
| C | 0.78052  | 0.91030  | -2.83806 |
| C | 2.18832  | 0.46950  | -2.38388 |
| O | 0.70066  | 1.13279  | -4.23352 |
| O | 1.95395  | -0.59558 | -1.40229 |
| C | 3.07028  | 1.51629  | -1.73787 |
| O | 4.31193  | 0.91257  | -1.43332 |
| P | 5.68226  | 1.77993  | -0.80981 |
| N | -4.94112 | 0.53229  | 0.39902  |
| C | -4.64824 | -0.39336 | -0.69210 |
| C | -4.59431 | 0.31443  | -2.03969 |
| C | -3.53864 | -4.21462 | -2.15980 |
| C | -2.10967 | -3.88264 | -2.53635 |
| O | -1.22503 | -4.20378 | -1.58905 |
| O | -1.77697 | -3.41520 | -3.61091 |

|   |          |          |          |
|---|----------|----------|----------|
| C | 3.84224  | -5.67551 | -3.71184 |
| C | 4.29989  | -4.36327 | -3.12228 |
| N | 3.45927  | -3.35139 | -2.66378 |
| C | 5.58631  | -3.94333 | -2.91539 |
| C | 4.22607  | -2.37235 | -2.19465 |
| N | 5.51376  | -2.69519 | -2.33411 |
| C | 0.55963  | 1.86726  | 6.43930  |
| C | -0.31225 | 2.22172  | 5.25570  |
| C | -1.67877 | 1.91977  | 5.26389  |
| C | 0.21624  | 2.85650  | 4.12941  |
| C | -2.49523 | 2.25939  | 4.18798  |
| C | -0.59698 | 3.20087  | 3.04968  |
| C | -1.95778 | 2.91041  | 3.07809  |
| C | -5.41453 | -3.52413 | 2.79141  |
| C | -4.26057 | -2.58866 | 3.11816  |
| O | -4.30016 | -1.40645 | 2.76191  |
| N | -3.21362 | -3.09996 | 3.78639  |
| C | -3.12144 | 6.37268  | -1.80232 |
| C | -2.27234 | 5.23909  | -1.32444 |
| N | -0.90707 | 5.35905  | -1.20224 |
| C | -2.66433 | 3.97805  | -0.94704 |
| C | -0.49451 | 4.18759  | -0.75658 |
| N | -1.51630 | 3.31640  | -0.59108 |
| O | 1.02357  | -2.76974 | -2.51789 |
| H | -2.34595 | -0.49001 | 2.49388  |
| H | 0.42737  | -1.68368 | -0.66547 |
| H | -0.89873 | 0.19705  | -1.59465 |
| H | -0.70699 | -0.73851 | -3.06159 |
| H | 0.52164  | 1.87094  | -2.38810 |
| H | 2.72724  | 0.00058  | -3.21733 |
| H | 0.81941  | 0.29246  | -4.69543 |
| H | 2.58048  | 1.89892  | -0.83074 |
| H | 3.18649  | 2.34366  | -2.45379 |
| H | -5.09239 | 0.00256  | 1.25697  |
| H | -4.09501 | 1.07443  | 0.57526  |
| H | -4.39063 | -0.39063 | -2.85083 |
| H | -3.79223 | 1.06153  | -2.03879 |
| H | -3.67023 | -4.18774 | -1.07729 |
| H | -4.20525 | -3.50177 | -2.64616 |
| H | 3.22450  | -5.51727 | -4.60171 |

|   |          |          |          |
|---|----------|----------|----------|
| H | 4.71268  | -6.27204 | -3.99564 |
| H | 2.21952  | -3.14839 | -2.64742 |
| H | 6.52749  | -4.42632 | -3.12770 |
| H | 3.90144  | -1.44177 | -1.74689 |
| H | 0.44460  | 0.81015  | 6.70532  |
| H | 0.29225  | 2.46483  | 7.31953  |
| H | -2.10512 | 1.39697  | 6.11791  |
| H | 1.28096  | 3.07546  | 4.08613  |
| H | -3.55063 | 1.99901  | 4.20705  |
| H | -0.16425 | 3.68340  | 2.17830  |
| H | -2.58415 | 3.16587  | 2.22820  |
| H | -5.50811 | -3.59176 | 1.70301  |
| H | -5.29320 | -4.53094 | 3.20184  |
| H | -3.17688 | -4.07860 | 4.02258  |
| H | -2.37932 | -2.51509 | 3.97509  |
| H | -2.80394 | 6.70544  | -2.79735 |
| H | -4.17388 | 6.07454  | -1.85911 |
| H | -3.63490 | 3.50468  | -0.89520 |
| H | 0.53033  | 3.92494  | -0.52829 |
| H | -0.34577 | -3.84138 | -1.85928 |
| H | 0.54229  | -2.73647 | -3.36067 |
| H | 1.61684  | 2.04656  | 6.21962  |
| H | -3.04440 | 7.23363  | -1.12806 |
| H | 3.25077  | -6.24485 | -2.98773 |
| H | 6.26871  | -2.07606 | -2.05758 |
| H | -6.33929 | -3.08631 | 3.17668  |
| H | -3.77451 | -5.22233 | -2.52111 |
| H | -5.54282 | 0.82603  | -2.22611 |
| H | 2.21374  | 0.37379  | 1.47953  |
| H | 1.70255  | -0.97264 | 3.50901  |
| H | -1.48987 | 2.35622  | -0.22119 |
| O | 6.56063  | 0.38086  | -0.56970 |
| O | 6.27549  | 2.55051  | -1.93551 |
| O | 5.30655  | 2.32313  | 0.53188  |
| H | 6.48905  | 0.19203  | 0.37539  |
| H | -5.46637 | -1.13465 | -0.71353 |
| C | -3.39252 | -1.21603 | -0.44899 |
| O | -2.61837 | -1.55842 | -1.31992 |
| H | -3.24752 | -1.54842 | 0.59489  |

Charge: -1 Point Group:  $C_1$

Total electronic energy = -2968.180515 a.u.

Zero-point corrected total electronic energy ( $E_{ZPE}$ ) = -2967.34326 a.u.

No. of imaginary frequency = 6 (141.66i  $\text{cm}^{-1}$ , corresponding to C1'-O bond formation at the positively charged oxocarbenium center, and 52.95i  $\text{cm}^{-1}$ , 23.66i  $\text{cm}^{-1}$ , 14.10i  $\text{cm}^{-1}$ , 11.75i  $\text{cm}^{-1}$ , 5.21i  $\text{cm}^{-1}$ )

**Product (PD)**

|   |          |          |          |
|---|----------|----------|----------|
| C | -1.29783 | 1.22234  | 0.53992  |
| N | -2.22528 | 0.87763  | 1.50732  |
| C | -1.92173 | 0.49889  | 2.80437  |
| C | -0.52340 | 0.49157  | 3.08339  |
| C | 0.35189  | 0.85184  | 2.08306  |
| N | 0.01280  | 1.20893  | 0.82938  |
| O | -1.73312 | 1.52403  | -0.60396 |
| O | -2.84612 | 0.19076  | 3.58982  |
| C | 0.69007  | -1.73350 | -0.74831 |
| C | 0.56939  | -0.77994 | -1.93202 |
| C | 2.00733  | -0.33110 | -2.24489 |
| C | 2.85112  | -0.92769 | -1.10066 |
| O | 2.48833  | -0.72331 | -3.52174 |
| O | 1.91800  | -1.47749 | -0.15335 |
| C | 3.76273  | 0.06088  | -0.40131 |
| O | 4.51587  | -0.63651 | 0.58387  |
| P | 5.76768  | 0.07474  | 1.53695  |
| N | -4.28724 | 1.76352  | -2.06723 |
| C | -3.93582 | 0.45629  | -2.61455 |
| C | -3.14214 | 0.57176  | -3.91142 |
| C | -3.86203 | -3.75969 | -2.38358 |
| C | -2.41056 | -3.87940 | -1.99765 |
| O | -2.21782 | -3.94898 | -0.67546 |
| O | -1.49138 | -3.95406 | -2.79471 |
| C | 2.48413  | -7.31178 | 0.09477  |
| C | 3.13994  | -6.00149 | 0.48128  |
| N | 2.61931  | -4.73255 | 0.22581  |
| C | 4.31259  | -5.77519 | 1.14643  |
| C | 3.43171  | -3.79373 | 0.71562  |
| N | 4.46622  | -4.40567 | 1.27618  |
| C | -1.19870 | 4.09803  | 5.28938  |
| C | -1.71549 | 4.10515  | 3.86835  |
| C | -3.06989 | 3.88072  | 3.60102  |

|   |          |          |          |
|---|----------|----------|----------|
| C | -0.85982 | 4.34276  | 2.78904  |
| C | -3.55828 | 3.91070  | 2.29683  |
| C | -1.34253 | 4.37706  | 1.48151  |
| C | -2.69639 | 4.16819  | 1.23211  |
| C | -6.99582 | -0.80911 | 0.77546  |
| C | -5.76387 | -0.15444 | 1.37851  |
| O | -5.21690 | 0.78521  | 0.79096  |
| N | -5.30166 | -0.64271 | 2.54033  |
| C | 0.26941  | 5.75755  | -4.55231 |
| C | 0.35989  | 4.77663  | -3.42891 |
| N | 1.50307  | 4.64190  | -2.67528 |
| C | -0.60111 | 3.90574  | -2.97671 |
| C | 1.22405  | 3.70509  | -1.78727 |
| N | -0.03200 | 3.22619  | -1.93063 |
| O | 0.65102  | -3.15013 | -1.12444 |
| H | -3.21043 | 0.99971  | 1.26605  |
| H | -0.07971 | -1.58795 | 0.01142  |
| H | -0.04258 | 0.06922  | -1.62146 |
| H | 0.07653  | -1.22403 | -2.80203 |
| H | 2.07668  | 0.75880  | -2.25111 |
| H | 3.46626  | -1.74747 | -1.50643 |
| H | 2.36906  | -1.67754 | -3.61369 |
| H | 3.15602  | 0.85064  | 0.06326  |
| H | 4.42424  | 0.51196  | -1.15471 |
| H | -4.91208 | 1.63418  | -1.27155 |
| H | -3.43962 | 2.15659  | -1.65667 |
| H | -2.19185 | 1.08478  | -3.72478 |
| H | -3.71281 | 1.15260  | -4.64149 |
| H | -3.93253 | -3.12645 | -3.26867 |
| H | -4.25006 | -4.75426 | -2.63137 |
| H | 2.33239  | -7.37140 | -0.98719 |
| H | 3.12736  | -8.13838 | 0.40333  |
| H | 1.77526  | -4.44826 | -0.29509 |
| H | 5.03782  | -6.47224 | 1.53515  |
| H | 3.26819  | -2.71875 | 0.67443  |
| H | -1.63938 | 3.27494  | 5.86274  |
| H | -1.44794 | 5.03518  | 5.80320  |
| H | -3.74615 | 3.65314  | 4.42265  |
| H | 0.20350  | 4.48537  | 2.96844  |
| H | -4.60805 | 3.70288  | 2.10755  |



|   |          |          |          |
|---|----------|----------|----------|
| H | -0.65618 | 4.53772  | 0.65464  |
| H | -3.06671 | 4.16456  | 0.21113  |
| H | -6.71883 | -1.24520 | -0.18959 |
| H | -7.43280 | -1.58892 | 1.40644  |
| H | -5.73778 | -1.44128 | 2.97295  |
| H | -4.42213 | -0.27446 | 2.95546  |
| H | 1.04500  | 5.56596  | -5.30317 |
| H | -0.70746 | 5.69685  | -5.04461 |
| H | -1.61745 | 3.71840  | -3.29420 |
| H | 1.89055  | 3.34423  | -1.01528 |
| H | -1.25757 | -3.86291 | -0.51117 |
| H | 0.12990  | -3.27133 | -1.94253 |
| H | -0.11057 | 3.98166  | 5.31293  |
| H | 0.40830  | 6.78382  | -4.19194 |
| H | 1.51304  | -7.42174 | 0.58693  |
| H | 5.22973  | -3.88265 | 1.70141  |
| H | -7.74621 | -0.03700 | 0.58555  |
| H | -4.44876 | -3.33965 | -1.56586 |
| H | -2.91148 | -0.41448 | -4.32461 |
| H | 1.42299  | 0.85327  | 2.28292  |
| H | -0.18486 | 0.21584  | 4.07432  |
| H | -0.51731 | 2.52300  | -1.35497 |
| O | 5.91866  | -1.30450 | 2.48772  |
| O | 6.97818  | 0.21336  | 0.68162  |
| O | 5.16999  | 1.14343  | 2.39577  |
| H | 5.48128  | -1.07821 | 3.31936  |
| H | -4.88480 | -0.06759 | -2.82920 |
| C | -3.23034 | -0.44236 | -1.61049 |
| O | -2.38275 | -1.26096 | -1.90886 |
| H | -3.59254 | -0.36072 | -0.57090 |

Charge: -1 Point Group:  $C_1$

Total electronic energy = -2968.20967 a.u.

Zero-point corrected total electronic energy ( $E_{ZPE}$ ) = -2967.36479 a.u.

No. of imaginary frequency = 5 ( $45.54i$   $\text{cm}^{-1}$ ,  $34.55i$   $\text{cm}^{-1}$ ,  $31.19i$   $\text{cm}^{-1}$ ,  $13.88i$   $\text{cm}^{-1}$ ,  $13.24i$   $\text{cm}^{-1}$ ,  $3.08i$   $\text{cm}^{-1}$ )

Optimized Cartesian coordinates for QM/MM active site for geometry optimization calculations.

|   |           |           |          |
|---|-----------|-----------|----------|
| N | 15.752078 | 0.078982  | 2.223261 |
| C | 15.352022 | 0.627332  | 3.526157 |
| C | 14.644657 | 1.934920  | 3.326255 |
| O | 14.256236 | 2.271930  | 2.222163 |
| H | 14.675673 | -0.119318 | 4.036244 |
| H | 16.253719 | 0.731993  | 4.165399 |
| N | 14.436877 | 2.662162  | 4.437750 |
| C | 13.680223 | 3.913344  | 4.379914 |
| C | 14.540414 | 5.188737  | 4.328315 |
| O | 14.135136 | 6.122699  | 3.624809 |
| H | 14.914592 | 2.412769  | 5.295590 |
| H | 13.224852 | 3.931767  | 3.388503 |
| C | 12.448027 | 4.006024  | 5.335221 |
| C | 12.466784 | 3.549037  | 6.806386 |
| C | 12.822241 | 4.626590  | 7.818169 |
| O | 12.079833 | 4.918270  | 8.747394 |
| N | 13.977144 | 5.270016  | 7.543426 |
| H | 11.703319 | 3.392871  | 4.830089 |
| H | 12.069712 | 5.032740  | 5.280659 |
| H | 13.083593 | 2.657629  | 6.970343 |
| H | 11.450366 | 3.260574  | 7.072843 |
| H | 14.688840 | 4.793643  | 7.012691 |
| H | 14.349437 | 6.005358  | 8.131999 |
| N | 15.684914 | 5.301496  | 5.023618 |
| C | 16.435915 | 6.553395  | 5.021215 |
| C | 17.750034 | 6.283047  | 5.754384 |
| O | 17.905731 | 5.292060  | 6.473388 |
| H | 16.069374 | 4.538015  | 5.566136 |
| H | 16.659143 | 6.765587  | 3.968277 |
| C | 15.655256 | 7.781538  | 5.589276 |
| C | 15.759459 | 8.109043  | 7.087270 |
| O | 15.677774 | 9.324720  | 7.388816 |
| O | 15.834379 | 7.179639  | 7.929012 |
| H | 14.592641 | 7.654015  | 5.356743 |
| H | 15.970152 | 8.668476  | 5.027386 |
| N | 18.785076 | 7.129016  | 5.510924 |
| C | 20.095436 | 6.856766  | 6.102253 |
| C | 20.077831 | 6.898629  | 7.636403 |
| O | 19.283844 | 7.599756  | 8.240597 |

|   |           |           |           |
|---|-----------|-----------|-----------|
| H | 20.456308 | 5.881739  | 5.748318  |
| C | 20.982666 | 8.010913  | 5.580772  |
| C | 20.252045 | 8.512588  | 4.334601  |
| C | 18.783350 | 8.374353  | 4.733791  |
| H | 22.001421 | 7.674568  | 5.382652  |
| H | 21.034349 | 8.806389  | 6.331767  |
| H | 20.467443 | 7.869385  | 3.473745  |
| H | 20.531044 | 9.535983  | 4.065864  |
| H | 18.126755 | 8.314421  | 3.864768  |
| H | 18.464373 | 9.213358  | 5.364721  |
| N | 21.082838 | 6.219333  | 8.262930  |
| C | 21.322899 | 6.373165  | 9.690621  |
| C | 21.495468 | 7.864827  | 10.052977 |
| O | 22.177322 | 8.610364  | 9.359995  |
| H | 21.658148 | 5.581976  | 7.725415  |
| H | 20.467724 | 5.961179  | 10.240077 |
| C | 22.620472 | 5.673297  | 10.155339 |
| C | 22.609983 | 4.167785  | 10.087546 |
| C | 21.737619 | 3.441041  | 10.911067 |
| C | 23.479818 | 3.452909  | 9.262919  |
| C | 21.672733 | 2.060058  | 10.854263 |
| C | 23.446516 | 2.055555  | 9.208814  |
| C | 22.528248 | 1.366073  | 10.000522 |
| O | 22.423021 | 0.008365  | 10.034642 |
| H | 22.789976 | 5.970278  | 11.196630 |
| H | 23.458712 | 6.076375  | 9.572258  |
| H | 21.103409 | 3.968572  | 11.616649 |
| H | 24.221052 | 3.984174  | 8.660973  |
| H | 20.990770 | 1.506775  | 11.491181 |
| H | 24.142971 | 1.535164  | 8.556179  |
| H | 23.038301 | -0.365981 | 9.398880  |
| N | 20.886927 | 8.271312  | 11.203234 |
| C | 20.871489 | 9.630448  | 11.608357 |
| C | 21.844379 | 10.012078 | 12.774839 |
| O | 21.811766 | 11.145904 | 13.261987 |
| H | 20.437326 | 7.575240  | 11.793870 |
| H | 21.213842 | 10.209388 | 10.755707 |
| C | 19.444748 | 10.079127 | 11.934148 |
| C | 18.805054 | 9.263219  | 13.005756 |
| N | 17.728586 | 8.428773  | 12.767531 |
| C | 19.119408 | 9.103217  | 14.321095 |
| C | 17.411936 | 7.775981  | 13.884099 |
| N | 18.243158 | 8.186244  | 14.829288 |
| H | 18.846922 | 9.992870  | 11.025056 |
| H | 19.440689 | 11.140196 | 12.206861 |
| H | 17.323063 | 8.211041  | 11.839332 |

|   |           |           |           |
|---|-----------|-----------|-----------|
| H | 19.918043 | 9.492722  | 14.929389 |
| H | 16.625290 | 7.046117  | 14.006152 |
| H | 18.308775 | 7.841568  | 15.778944 |
| N | 22.736551 | 9.078996  | 13.223666 |
| H | 22.759466 | 8.110551  | 12.875205 |
| N | 21.868481 | 0.272998  | 5.413549  |
| C | 22.224897 | -0.443233 | 6.611400  |
| C | 23.701492 | -0.607805 | 6.926183  |
| O | 24.072870 | -1.067651 | 8.009961  |
| H | 21.304222 | 1.099829  | 5.647434  |
| H | 21.831137 | 0.155781  | 7.463301  |
| C | 21.473915 | -1.889570 | 6.637934  |
| C | 20.011524 | -1.619597 | 6.512905  |
| C | 19.343903 | -1.830317 | 5.311726  |
| C | 19.298033 | -1.170930 | 7.627682  |
| C | 17.985119 | -1.537079 | 5.203970  |
| C | 17.940393 | -0.898233 | 7.531697  |
| C | 17.278700 | -1.082531 | 6.314719  |
| H | 21.718403 | -2.356897 | 7.592275  |
| H | 21.869608 | -2.492802 | 5.819544  |
| H | 19.884970 | -2.185176 | 4.436600  |
| H | 19.823839 | -0.998037 | 8.565915  |
| H | 17.481073 | -1.685168 | 4.253067  |
| H | 17.396366 | -0.547861 | 8.403154  |
| H | 16.211023 | -0.894919 | 6.242177  |
| C | 16.893831 | 3.753932  | 0.663465  |
| H | 16.323528 | 2.857632  | 1.011309  |
| C | 17.453266 | 4.553248  | 1.862038  |
| C | 17.960442 | 3.663676  | 2.999638  |
| O | 17.400364 | 2.631854  | 3.317163  |
| N | 19.021223 | 4.169069  | 3.609412  |
| H | 16.671930 | 5.196695  | 2.300503  |
| H | 18.250805 | 5.251284  | 1.518492  |
| H | 19.498816 | 5.001467  | 3.282586  |
| H | 19.449623 | 3.624696  | 4.352129  |
| N | 10.638093 | -3.649339 | 8.715250  |
| C | 11.963569 | -3.054270 | 8.756299  |
| C | 12.762704 | -3.728999 | 9.876611  |
| O | 12.225430 | -4.015554 | 10.936936 |
| H | 9.858944  | -3.076314 | 9.067353  |
| H | 12.437235 | -3.226084 | 7.773444  |
| C | 11.829623 | -1.476700 | 9.057896  |
| C | 13.129450 | -0.770593 | 8.937304  |
| N | 13.959358 | -0.613388 | 10.020822 |
| C | 13.656327 | -0.135985 | 7.841864  |
| C | 14.984964 | 0.074676  | 9.587685  |

|   |           |           |           |
|---|-----------|-----------|-----------|
| N | 14.857794 | 0.382936  | 8.264218  |
| H | 11.440448 | -1.368919 | 10.066413 |
| H | 11.111961 | -1.059667 | 8.355946  |
| H | 13.324331 | -0.062693 | 6.814118  |
| H | 15.843544 | 0.370218  | 10.180643 |
| H | 15.446890 | 1.018719  | 7.742387  |
| O | 17.029850 | 7.234459  | 10.420996 |
| H | 17.342482 | 6.336794  | 10.569186 |
| H | 16.653114 | 7.233153  | 9.505423  |
| C | 20.080198 | 3.007446  | 7.818487  |
| C | 19.619120 | 2.652313  | 6.516631  |
| N | 18.286671 | 2.357966  | 6.403207  |
| C | 17.318993 | 2.740470  | 7.289341  |
| N | 17.823990 | 3.196675  | 8.503980  |
| C | 19.162142 | 3.344300  | 8.726004  |
| O | 20.304827 | 2.665358  | 5.486454  |
| O | 16.135563 | 2.654685  | 6.992979  |
| C | 16.927969 | 4.013493  | 9.426923  |
| C | 15.542454 | 3.522684  | 9.715269  |
| O | 17.495325 | 4.360402  | 10.687547 |
| H | 17.954605 | 2.148684  | 5.455725  |
| H | 15.240127 | 2.682515  | 9.104226  |
| H | 14.844276 | 4.320371  | 9.480477  |
| H | 16.844381 | 4.917233  | 8.834065  |
| H | 19.454878 | 3.747385  | 9.684919  |
| H | 21.119961 | 3.213169  | 8.024668  |

Cartesian coordinates for QM/MM active site for single-point calculations.

|   |           |          |           |
|---|-----------|----------|-----------|
| C | 19.295973 | 4.731270 | 18.024103 |
| C | 18.944773 | 3.377273 | 17.448734 |
| O | 18.263023 | 2.589793 | 18.434092 |
| C | 18.114044 | 3.285540 | 16.168749 |
| C | 16.711210 | 2.994697 | 16.683485 |
| O | 18.543661 | 2.182240 | 15.350052 |
| H | 19.912823 | 2.891420 | 17.281736 |
| H | 18.094881 | 4.232559 | 15.614800 |
| H | 16.157433 | 3.928630 | 16.788385 |
| H | 16.126926 | 2.372768 | 15.998198 |
| P | 13.671378 | 3.538978 | 13.061518 |
| O | 12.874393 | 4.695830 | 13.563131 |
| O | 14.739105 | 2.889890 | 13.888484 |
| O | 12.815276 | 2.368018 | 12.391223 |

|   |           |           |           |
|---|-----------|-----------|-----------|
| C | 11.669369 | 2.676332  | 11.612541 |
| C | 10.790257 | 1.453644  | 11.713755 |
| O | 10.413697 | 1.229677  | 13.084391 |
| C | 9.482544  | 1.365052  | 10.939628 |
| H | 11.940639 | 2.847831  | 10.565754 |
| H | 11.117413 | 3.553992  | 11.951826 |
| H | 11.434203 | 0.620661  | 11.406176 |
| N | 15.752078 | 0.078982  | 2.223261  |
| C | 15.352022 | 0.627332  | 3.526157  |
| C | 14.644657 | 1.934920  | 3.326255  |
| O | 14.256236 | 2.271930  | 2.222163  |
| H | 14.675673 | -0.119318 | 4.036244  |
| H | 16.253719 | 0.731993  | 4.165399  |
| N | 14.436877 | 2.662162  | 4.437750  |
| C | 13.680223 | 3.913344  | 4.379914  |
| C | 14.540414 | 5.188737  | 4.328315  |
| O | 14.135136 | 6.122699  | 3.624809  |
| H | 14.914592 | 2.412769  | 5.295590  |
| H | 13.224852 | 3.931767  | 3.388503  |
| C | 12.448027 | 4.006024  | 5.335221  |
| C | 12.466784 | 3.549037  | 6.806386  |
| C | 12.822241 | 4.626590  | 7.818169  |
| O | 12.079833 | 4.918270  | 8.747394  |
| N | 13.977144 | 5.270016  | 7.543426  |
| H | 11.703319 | 3.392871  | 4.830089  |
| H | 12.069712 | 5.032740  | 5.280659  |
| H | 13.083593 | 2.657629  | 6.970343  |
| H | 11.450366 | 3.260574  | 7.072843  |
| H | 14.688840 | 4.793643  | 7.012691  |
| H | 14.349437 | 6.005358  | 8.131999  |
| N | 15.684914 | 5.301496  | 5.023618  |
| C | 16.435915 | 6.553395  | 5.021215  |
| C | 17.750034 | 6.283047  | 5.754384  |
| O | 17.905731 | 5.292060  | 6.473388  |
| H | 16.069374 | 4.538015  | 5.566136  |
| H | 16.659143 | 6.765587  | 3.968277  |
| C | 15.655256 | 7.781538  | 5.589276  |
| C | 15.759459 | 8.109043  | 7.087270  |
| O | 15.677774 | 9.324720  | 7.388816  |
| O | 15.834379 | 7.179639  | 7.929012  |
| H | 14.592641 | 7.654015  | 5.356743  |
| H | 15.970152 | 8.668476  | 5.027386  |
| N | 18.785076 | 7.129016  | 5.510924  |
| C | 20.095436 | 6.856766  | 6.102253  |
| C | 20.077831 | 6.898629  | 7.636403  |
| O | 19.283844 | 7.599756  | 8.240597  |

|   |           |           |           |
|---|-----------|-----------|-----------|
| H | 20.456308 | 5.881739  | 5.748318  |
| C | 20.982666 | 8.010913  | 5.580772  |
| C | 20.252045 | 8.512588  | 4.334601  |
| C | 18.783350 | 8.374353  | 4.733791  |
| H | 22.001421 | 7.674568  | 5.382652  |
| H | 21.034349 | 8.806389  | 6.331767  |
| H | 20.467443 | 7.869385  | 3.473745  |
| H | 20.531044 | 9.535983  | 4.065864  |
| H | 18.126755 | 8.314421  | 3.864768  |
| H | 18.464373 | 9.213358  | 5.364721  |
| N | 21.082838 | 6.219333  | 8.262930  |
| C | 21.322899 | 6.373165  | 9.690621  |
| C | 21.495468 | 7.864827  | 10.052977 |
| O | 22.177322 | 8.610364  | 9.359995  |
| H | 21.658148 | 5.581976  | 7.725415  |
| H | 20.467724 | 5.961179  | 10.240077 |
| C | 22.620472 | 5.673297  | 10.155339 |
| C | 22.609983 | 4.167785  | 10.087546 |
| C | 21.737619 | 3.441041  | 10.911067 |
| C | 23.479818 | 3.452909  | 9.262919  |
| C | 21.672733 | 2.060058  | 10.854263 |
| C | 23.446516 | 2.055555  | 9.208814  |
| C | 22.528248 | 1.366073  | 10.000522 |
| O | 22.423021 | 0.008365  | 10.034642 |
| H | 22.789976 | 5.970278  | 11.196630 |
| H | 23.458712 | 6.076375  | 9.572258  |
| H | 21.103409 | 3.968572  | 11.616649 |
| H | 24.221052 | 3.984174  | 8.660973  |
| H | 20.990770 | 1.506775  | 11.491181 |
| H | 24.142971 | 1.535164  | 8.556179  |
| H | 23.038301 | -0.365981 | 9.398880  |
| N | 20.886927 | 8.271312  | 11.203234 |
| C | 20.871489 | 9.630448  | 11.608357 |
| C | 21.844379 | 10.012078 | 12.774839 |
| O | 21.811766 | 11.145904 | 13.261987 |
| H | 20.437326 | 7.575240  | 11.793870 |
| H | 21.213842 | 10.209388 | 10.755707 |
| C | 19.444748 | 10.079127 | 11.934148 |
| C | 18.805054 | 9.263219  | 13.005756 |
| N | 17.728586 | 8.428773  | 12.767531 |
| C | 19.119408 | 9.103217  | 14.321095 |
| C | 17.411936 | 7.775981  | 13.884099 |
| N | 18.243158 | 8.186244  | 14.829288 |
| H | 18.846922 | 9.992870  | 11.025056 |
| H | 19.440689 | 11.140196 | 12.206861 |
| H | 17.323063 | 8.211041  | 11.839332 |

|   |           |           |           |
|---|-----------|-----------|-----------|
| H | 19.918043 | 9.492722  | 14.929389 |
| H | 16.625290 | 7.046117  | 14.006152 |
| H | 18.308775 | 7.841568  | 15.778944 |
| N | 22.736551 | 9.078996  | 13.223666 |
| H | 22.759466 | 8.110551  | 12.875205 |
| N | 21.868481 | 0.272998  | 5.413549  |
| C | 22.224897 | -0.443233 | 6.611400  |
| C | 23.701492 | -0.607805 | 6.926183  |
| O | 24.072870 | -1.067651 | 8.009961  |
| H | 21.304222 | 1.099829  | 5.647434  |
| H | 21.831137 | 0.155781  | 7.463301  |
| C | 21.473915 | -1.889570 | 6.637934  |
| C | 20.011524 | -1.619597 | 6.512905  |
| C | 19.343903 | -1.830317 | 5.311726  |
| C | 19.298033 | -1.170930 | 7.627682  |
| C | 17.985119 | -1.537079 | 5.203970  |
| C | 17.940393 | -0.898233 | 7.531697  |
| C | 17.278700 | -1.082531 | 6.314719  |
| H | 21.718403 | -2.356897 | 7.592275  |
| H | 21.869608 | -2.492802 | 5.819544  |
| H | 19.884970 | -2.185176 | 4.436600  |
| H | 19.823839 | -0.998037 | 8.565915  |
| H | 17.481073 | -1.685168 | 4.253067  |
| H | 17.396366 | -0.547861 | 8.403154  |
| H | 16.211023 | -0.894919 | 6.242177  |
| C | 16.893831 | 3.753932  | 0.663465  |
| H | 16.323528 | 2.857632  | 1.011309  |
| C | 17.453266 | 4.553248  | 1.862038  |
| C | 17.960442 | 3.663676  | 2.999638  |
| O | 17.400364 | 2.631854  | 3.317163  |
| N | 19.021223 | 4.169069  | 3.609412  |
| H | 16.671930 | 5.196695  | 2.300503  |
| H | 18.250805 | 5.251284  | 1.518492  |
| H | 19.498816 | 5.001467  | 3.282586  |
| H | 19.449623 | 3.624696  | 4.352129  |
| N | 10.638093 | -3.649339 | 8.715250  |
| C | 11.963569 | -3.054270 | 8.756299  |
| C | 12.762704 | -3.728999 | 9.876611  |
| O | 12.225430 | -4.015554 | 10.936936 |
| H | 9.858944  | -3.076314 | 9.067353  |
| H | 12.437235 | -3.226084 | 7.773444  |
| C | 11.829623 | -1.476700 | 9.057896  |
| C | 13.129450 | -0.770593 | 8.937304  |
| N | 13.959358 | -0.613388 | 10.020822 |
| C | 13.656327 | -0.135985 | 7.841864  |
| C | 14.984964 | 0.074676  | 9.587685  |



|   |           |           |           |
|---|-----------|-----------|-----------|
| N | 14.857794 | 0.382936  | 8.264218  |
| H | 11.440448 | -1.368919 | 10.066413 |
| H | 11.111961 | -1.059667 | 8.355946  |
| H | 13.324331 | -0.062693 | 6.814118  |
| H | 15.843544 | 0.370218  | 10.180643 |
| H | 15.446890 | 1.018719  | 7.742387  |
| O | 17.029850 | 7.234459  | 10.420996 |
| H | 17.342482 | 6.336794  | 10.569186 |
| H | 16.653114 | 7.233153  | 9.505423  |
| C | 20.080198 | 3.007446  | 7.818487  |
| C | 19.619120 | 2.652313  | 6.516631  |
| N | 18.286671 | 2.357966  | 6.403207  |
| C | 17.318993 | 2.740470  | 7.289341  |
| N | 17.823990 | 3.196675  | 8.503980  |
| C | 19.162142 | 3.344300  | 8.726004  |
| O | 20.304827 | 2.665358  | 5.486454  |
| O | 16.135563 | 2.654685  | 6.992979  |
| C | 16.927969 | 4.013493  | 9.426923  |
| C | 15.542454 | 3.522684  | 9.715269  |
| C | 15.468281 | 3.283112  | 11.197873 |
| C | 16.786394 | 3.782352  | 11.791101 |
| O | 14.385630 | 4.056007  | 11.712134 |
| O | 17.495325 | 4.360402  | 10.687547 |
| C | 17.616854 | 2.739578  | 12.512065 |
| O | 18.722490 | 3.374149  | 13.151029 |
| P | 19.595367 | 2.448941  | 14.160312 |
| O | 19.889328 | 1.122723  | 13.522293 |
| O | 20.716814 | 3.344510  | 14.600105 |
| H | 17.954605 | 2.148684  | 5.455725  |
| H | 15.240127 | 2.682515  | 9.104226  |
| H | 14.844276 | 4.320371  | 9.480477  |
| H | 16.844381 | 4.917233  | 8.834065  |
| H | 15.343510 | 2.207129  | 11.373619 |
| H | 17.929085 | 1.976827  | 11.793000 |
| H | 16.934200 | 2.278136  | 13.241313 |
| H | 16.590733 | 4.588815  | 12.508771 |
| H | 19.454878 | 3.747385  | 9.684919  |
| H | 21.119961 | 3.213169  | 8.024668  |
